# Bayesian multivariate reanalysis of large genetic studies identifies many new associations

Michael C. Turchin<sup>1,3</sup> and Matthew Stephens<sup>1,2,†</sup>

<sup>1</sup>Department of Human Genetics, The University of Chicago

<sup>2</sup>Department of Statistics, The University of Chicago

<sup>3</sup>Current Address: Center for Computational Molecular Biology, Department of Ecology And Evolutionary Biology, Brown University

<sup>†</sup>To whom correspondence should be addressed:

mstephens@uchicago.edu

August 1, 2019

## Abstract

1

2

3

4

5

6

7

8

9

10

Genome-wide association studies (GWAS) have now been conducted for hundreds of phenotypes of relevance to human health. Many such GWAS involve multiple closely-related phenotypes collected on the same samples. However, the vast majority of these GWAS have been analyzed using simple univariate analyses, which consider one phenotype at a time. This is despite the fact that, at least in simulation experiments, multivariate analyses have been shown to be more powerful at detecting associations. Here, we conduct multivariate association analyses on 13 different publicly-available GWAS datasets that involve multiple closely-related phenotypes. These data

11 include large studies of anthropometric traits (GIANT), plasma lipid traits  
12 (GlobalLipids), and red blood cell traits (HaemgenRBC). Our analyses iden-  
13 tify many new associations (433 in total across the 13 studies), many of which  
14 replicate when follow-up samples are available. Overall, our results demon-  
15 strate that multivariate analyses can help make more effective use of data  
16 from both existing and future GWAS.

## 17 **1 Author Summary**

18 Genome-wide association studies (GWAS) have become a common and powerful  
19 tool for identifying significant correlations between markers of genetic variation  
20 and physical traits of interest. Often these studies are conducted by comparing  
21 genetic variation against single traits one at a time ('univariate'); however, it has  
22 previously been shown that it is possible to increase your power to detect significant  
23 associations by comparing genetic variation against multiple traits simultaneously  
24 ('multivariate'). Despite this apparent increase in power though, researchers still  
25 rarely conduct multivariate GWAS, even when studies have multiple traits readily  
26 available. Here, we reanalyze 13 previously published GWAS using a multivariate  
27 method and find >400 additional associations. Our method makes use of univariate  
28 GWAS summary statistics and is available as a software package, thus making it  
29 accessible to other researchers interested in conducting the same analyses. We also

30 show, using studies that have multiple releases, that our new associations have high  
31 rates of replication. Overall, we argue multivariate approaches in GWAS should  
32 no longer be overlooked and how, often, there is low-hanging fruit in the form of  
33 new associations by running these methods on data already collected.

## 34 **2 Introduction**

35 Genome wide association studies (GWAS) have been widely used to identify genetic  
36 factors – particularly single nucleotide polymorphisms (SNPs) and copy number  
37 variations (CNVs) – associated with human disease risk and other phenotypes  
38 of interest ([Price et al., 2015](#); [Visscher et al., 2017](#)). Indeed, at time of writing  
39 over 24,000 such associations have been identified as ‘genome-wide significant’  
40 ([MacArthur et al., 2017](#)).

41 The vast majority of these many genetic association analyses consider only  
42 one phenotype at a time (“univariate association analysis”). This is despite the  
43 fact that measurements on multiple phenotypes are often available, and joint as-  
44 sociation analysis of multiple phenotypes (“multivariate association analysis”) can  
45 substantially increase power ([Jiang and Zeng, 1995](#); [Zhu and Zhang, 2009](#); [Shriner,](#)  
46 [2012](#); [Yang and Wang, 2012](#); [Galesloot et al., 2014](#)). There are likely multiple rea-  
47 sons for the preponderance of univariate analyses. One possible reason is that  
48 initial association analyses are usually performed under tight time constraints,

49 and at a time when many other analysis issues (e.g. quality control, population  
50 stratification) are competing for attention. In these conditions it makes sense to  
51 focus on the simplest possible approach that will quickly yield new associations,  
52 without overly worrying about loss of efficiency. In addition analysts may be legit-  
53 imately concerned that deviation from the most widely adopted analysis pipeline  
54 may invite unwanted additional reviewer attention.

55 Nonetheless, we believe that multivariate association analysis has an important  
56 role to play in making the most of costly and time-consuming GWAS studies. One  
57 way forward is to conduct multivariate analyses of previously-published GWAS,  
58 checking for additional associations that may have been missed by the initial uni-  
59 variate association analyses. This is greatly facilitated by the fact that many  
60 GWAS now make summary data from single-SNP tests freely available ([Willer  
61 et al., 2013](#); [Wood et al., 2014](#); [Locke et al., 2015](#); [Shungin et al., 2015](#); [Astle et al.,  
62 2016](#)), and that simple multivariate analysis can be conducted using such summary  
63 data ([Stephens, 2013](#); [Pickrell et al., 2016](#); [Hormozdiari et al., 2016](#)).

64 Here we demonstrate the potential benefits of reanalyzing published GWAS  
65 using multivariate methods. Specifically we apply multivariate methods from  
66 [Stephens 2013](#) to reanalyze 13 different GWAS whose initial publications reported  
67 only univariate results. In most cases our multivariate analyses find many new  
68 associations. For example, in GIANT 2014/5 we find over 150 new associations.

69 In studies with multiple data releases, we find that new multivariate associations  
70 found in initial releases typically replicate in subsequent releases, supporting that  
71 many of the new associations are likely real. We also demonstrate that the multi-  
72 variate approach is not equivalent to simply relaxing the univariate GWAS signif-  
73 icance threshold. Finally, we point out some limitations of the specific framework  
74 we used here, and suggest some alternative strategies that may help address those  
75 limitations in future multivariate GWAS analyses.

## 76 **3 Results**

### 77 **Multivariate association analyses**

78 To facilitate multivariate association analyses using the methods from [Stephens](#)  
79 [2013](#), we implemented them in an R package `bmass` (Bayesian multivariate anal-  
80 ysis of summary statistics). The software requires as input univariate GWAS  
81 summary statistics, for the same set of SNPs, on  $d$  related phenotypes. Then, for  
82 each SNP, it attempts to categorize each phenotype as belonging to one of three  
83 categories: **Unassociated**, **Directly Associated**, or **Indirectly Associated** with the  
84 SNP. The difference between **D** and **I** is that an indirect association disappears  
85 after controlling for associations with other phenotypes (see Online Methods and  
86 Supplementary Figure 1).

87 For  $d$  phenotypes, there are  $3^d$  possible assignments of phenotypes to these 3  
88 categories, and each assignment corresponds to a different “model”  $\gamma$ . For example,  
89 one model corresponds to the “null” that all phenotypes are **Unassociated**; another  
90 model corresponds to the model that all phenotypes are **Directly** associated; an-  
91 other model corresponds to just the first phenotype being **Directly** associated, etc.  
92 The goal of the association analysis is to determine which of these models is con-  
93 sistent with the data and, in particular, to assess overall evidence against the null  
94 model.

95 The support in the data for model  $\gamma$ , relative to the null model, is summarized  
96 by a Bayes Factor ( $\text{BF}_\gamma$ ). Large values of  $\text{BF}_\gamma$  indicate strong evidence for model  
97  $\gamma$  compared against the null. One advantage of Bayes Factors over  $p$ -values is that  
98 the Bayes Factors from different models can be easily compared and combined. For  
99 example, the overall evidence against the null is given by the (weighted) average  
100 of these BFs:

$$\text{BF}_{\text{av}} := \sum_{\gamma} w_{\gamma} \text{BF}_{\gamma} \quad (1)$$

101 where the weights  $w_{\gamma}$  are chosen to reflect the relative plausibility of each model  
102  $\gamma$ . In `bmass` we implemented the Empirical Bayes approach from [Stephens 2013](#)  
103 that learns appropriate weights from the data (see Online Methods).

## 104 Comparisons with published univariate analyses

105 To provide a benchmark against which to compare our multivariate analysis re-  
106 sults, we compiled a list of “previous univariate associations”: SNPs that were  
107 both reported as significant in the original publication and exceeded the original  
108 publication’s definition for genome-wide significance in at least one phenotype in  
109 the publicly-available (univariate) summary data analyzed here. This does not  
110 include all SNPs reported in every original publication because in some studies  
111 SNPs became genome-wide significant only after adding additional samples not  
112 included in the publicly available summary data.

113 We used these previous univariate associations to determine a significance  
114 threshold for our multivariate associations. Specifically, we declared a multivariate  
115 association as significant if its  $BF_{av}$  exceeds that of any previous univariate associa-  
116 tion’s  $BF_{av}$  in the same study (Stephens, 2013). The rationale is that the evidence  
117 for these multivariate associations exceeds the evidence for previously-reported  
118 genome-wide significant associations, which are generally regarded as likely to be  
119 (mostly) real associations.

120 Finally, we defined a list of “new multivariate associations”, which are SNPs  
121 that are significant in our multivariate analysis but are not a “previous univariate  
122 association”. To avoid double-counting of signals due to linkage disequilibrium  
123 (LD), we pruned the list of new multivariate associations so that they are all at

124 least 0.5Mb apart. For additional details, see Online Methods.

## 125 **Many new loci identified in reanalyzing 13 publicly available** 126 **GWAS studies**

127 We applied `bmass` to 13 publicly available GWAS studies, representing 10 dif-  
128 ferent collections of phenotypes (Table 1). Phenotypic collections include blood  
129 lipid traits (GlobalLipids: (Teslovich et al., 2010; Willer et al., 2013)), body mor-  
130 phological traits (GIANT: (Lango Allen et al., 2010; Speliotes et al., 2010; Heid  
131 et al., 2010; Wood et al., 2014; Locke et al., 2015; Shungin et al., 2015)), red blood  
132 cell traits (HaemgenRBC: (van der Harst et al., 2012; Astle et al., 2016)), blood  
133 pressure traits (International Consortium for Blood Pressure Genome-Wide Asso-  
134 ciation et al., 2011; Wain et al., 2011), bone density traits (Zheng et al., 2015), and  
135 kidney function traits (Kottgen et al., 2010; Boger et al., 2011). For three of these  
136 phenotypic collections (GlobalLipids, GIANT, and HaemgenRBC), two different  
137 releases were available from the source consortiums. We conducted basic QC as  
138 described in Online Methods.

139 Our multivariate analyses identify, in total, hundreds of new associations. The  
140 numbers of previous univariate associations and new multivariate associations are  
141 summarized in Figure 1 (see also Supplementary Table 2). For example, we iden-  
142 tify 162 new multivariate associations in GIANT2014/5, 65 in GlobalLipids2013,



| Dataset      | Release | <i>N</i> | Phenotypes                                                                               |
|--------------|---------|----------|------------------------------------------------------------------------------------------|
| GlobalLipids | 2010    | 95454    | LDL, HDL, TC, TG <sup>a</sup>                                                            |
|              | 2013    | 188577   | LDL, HDL, TC, TG                                                                         |
| GIANT        | 2010    | 77167    | Height, BMI, WHRadjBMI <sup>b</sup>                                                      |
|              | 2014/5  | 224459   | Height, BMI, WHRadjBMI                                                                   |
| HaemgenRBC   | 2012    | 135367   | RBC, PCV, MCV, MCH, MCHC, Hb <sup>c</sup>                                                |
|              | 2016    | 173480   | RBC, PCV, MCV, MCH, MCHC, Hb                                                             |
| ICBP         | 2011    | 69395    | SBP, DBP, PP, MAP <sup>d</sup>                                                           |
| MAGIC        | 2010    | 46186    | FstIns, FstGlu, HOMA_B, HOMA_IR <sup>e</sup>                                             |
| GEFOS        | 2015    | 32965    | FA, FN, LS <sup>f</sup>                                                                  |
| GIS          | 2014    | 48972    | Iron, Sat, TrnsFrn, Log10Frtn <sup>g</sup>                                               |
| SSGAC        | 2016    | 343072   | NEB_Pooled, AFB_Pooled <sup>h</sup>                                                      |
| CKDGen       | 2010/1  | 67093    | Crea, Cys, CKD, UACR, MA <sup>i</sup>                                                    |
| ENIGMA2      | 2015    | 30717    | ICV, Accumbens, Amygdala, Caudate, Hippocampus, Pallidum, Putamen, Thalamus <sup>j</sup> |

Table 1: **Dataset Summary.** *N* is the maximum number of samples contributing to each study.

a - Low-Density Lipoproteins (LDL), High-Density Lipoproteins (HDL), Total Cholesterol (TC), Total Triglycerides (TG)

b - Body Mass Index (BMI), Waist-Hip Ratio adjusted for BMI (WHRadjBMI)

c - Red Blood Cell Count (RBC), Packed Cell Volume (PCV), Mean Cell Volume (MCV), Mean Cell Haemoglobin (MCH), Mean Cell Haemoglobin Concentration (MCHC), Haemoglobin (Hb)

d - Systolic Blood Pressure (SBP), Diastolic Blood Pressure (DBP), Pulse Pressure (PP), Mean Arterial Pressure (MAP)

e - Fasting Insulin (FstIns), Fasting Glucose (FstGlu), Homeostatic Model Assessment of Beta Cell Function (HOMA\_B), Homeostatic Model Assessment of Insulin Resistance Function (HOMA\_IR)

f - Forearm Bone Mineral Density (FA), Femoral Neck Bone Mineral Density (FN), Lumbar Spine Bone Mineral Density (LS)

g - Serum Iron (Iron), Serum Transferrin Saturation (Sat), Serum Transferrin (TrnsFrn), Log-Transformed Ferritin (Log10Frtn)

h - Number of Children Ever Born, Male & Female (NEB\_Pooled), Age at First Birth, Male & Female (AFB\_Pooled)

i - Serum Creatine (Crea), Serum Cystatin (Cys), Chronic Kidney Disease (CKD), Urinary Albumin-to-Creatine Ratio (UACR), Microalbuminuria (MA)

j - Intracranial Volume (ICV), specified subcortical brain structures refer to MRI-derived volume measurements for each one

143 and 60 in HaemgenRBC2016. These represent power increases from 10% to 45%  
144 compared with previous univariate analyses.

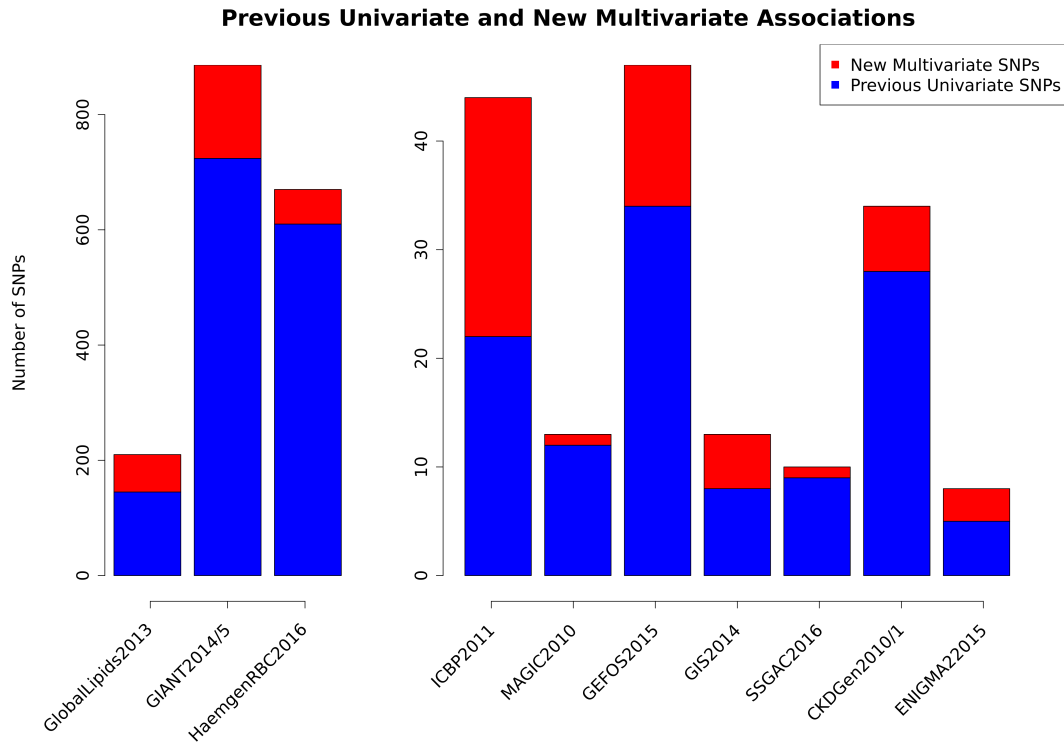

Figure 1: **Number of Independent Significant SNPs, By Study.** The barplot shows the number of independent SNPs that were significant in previous univariate analyses (blue) and the number of additional significant associations in our new multivariate analyses (red). For univariate analysis, significance levels were set by the original study. For multivariate analyses, we declared a SNP to be significant if its weighted average Bayes Factor ( $BF_{av}$ ) exceeded that of the smallest  $BF_{av}$  among the previous univariate significant SNPs. We considered SNPs more than .5Mb apart to be independent. See Table 1 and Online Methods for phenotype details, Online Methods for further analysis details, and Supplementary Tables 2-4 for lists of significant SNPs from each dataset.

| Dataset      | Release | —SNP Associations—     |                     | $BF_{av}$<br>Thresh | Overlap With<br>Next Release |
|--------------|---------|------------------------|---------------------|---------------------|------------------------------|
|              |         | Previous<br>Univariate | New<br>Multivariate |                     |                              |
| GlobalLipids | 2010    | 102                    | 19                  | 4.35                | 13/19                        |
|              | 2013    | 145                    | 65                  | 4.29                | -                            |
| GIANT        | 2010    | 144                    | 60                  | 4.11                | 49/60                        |
|              | 2014/5  | 724                    | 162                 | 4.49                | -                            |
| HaemgenRBC   | 2012    | 63                     | 16                  | 5.21                | 9/16                         |
|              | 2016    | 610                    | 60                  | 4.68                | -                            |
| ICBP         | 2011    | 22                     | 22                  | 5.24                | -                            |
| MAGIC        | 2010    | 12                     | 1                   | 6.90                | -                            |
| GEFOS        | 2015    | 34                     | 13                  | 5.06                | -                            |
| GIS          | 2014    | 8                      | 5                   | 7.04                | -                            |
| SSGAC        | 2016    | 9                      | 1                   | 5.43                | -                            |
| CKDGen       | 2010/1  | 28                     | 6                   | 4.10                | -                            |
| ENIGMA2      | 2015    | 5                      | 3                   | 7.48                | -                            |

Table 2: **Summary of New Multivariate Associations Identified.** Previous Univariate: the number of previous genome-wide significant univariate associations based on the publicly available summary data. New Multivariate: the number of new genome-wide significant multivariate associations.  $BF_{av}$  Thresh: the Bayes Factor threshold used in declaring new multivariate associations to be significant. Overlap With Next Release: for GlobalLipids2010, GIANT2010, and HaemgenRBC2012, the last column shows the number of new multivariate associations that overlap with the univariate GWAS associations in the next release from the same consortium; overlap is defined as being within 50kb of the univariate GWAS variant.

## 145 **Replication of multivariate associations across releases**

146 To demonstrate that many of these new multivariate associations are likely to  
147 be real we take advantage of three datasets that each have two releases sepa-  
148 rated by several years (GlobalLipids, GIANT, and HaemgenRBC). In each case  
149 we performed multivariate association analysis of the earlier release and checked  
150 how the new multivariate associations fared in univariate analyses of the later  
151 release (Figure 2). Since later releases include the samples from earlier releases,  
152 to assess “replication” we focus on whether the association in the new release is  
153 more significant than the original release – that is, whether the signal in the new  
154 (non-overlapping) samples provides additional evidence *over and above* the original  
155 signal. By this measure the results show high replication rates for the new mul-  
156 tivariate associations: in total, 84 of 94 new associations have smaller minimum  
157 univariate  $p$ -values in the later release (at exactly the same SNP), and indeed the  
158 majority of these reach univariate GWAS significance in the later release.

## 159 **Multivariate analysis is different from multiple univariate** 160 **analyses**

161 Because multivariate analysis takes account of *joint* patterns across phenotypes, its  
162 ranking of significance of SNPs can change compared with that from the univariate  
163  $p$ -values alone. That is, multivariate analysis is not simply equivalent to multiple

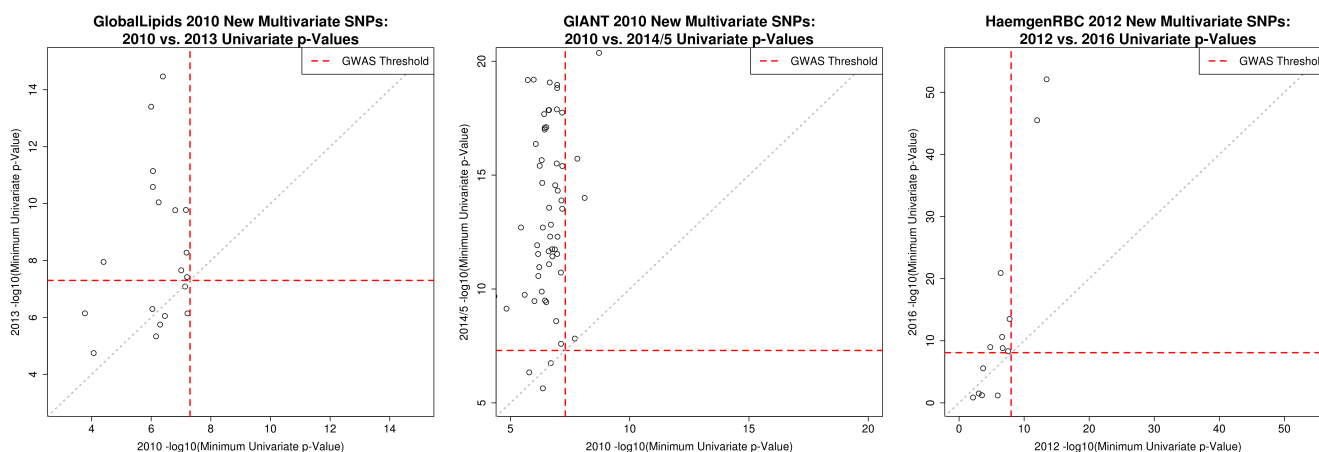

**Figure 2: Replication of New Multivariate Associations.** The figure shows results based on earlier and later releases from studies with multiple releases (GlobalLipids, GIANT, and HaemgenRBC). Each point represents a new multivariate association identified in our multivariate analysis of the earlier release. The  $x$ - and  $y$ -axes show the minimum (across phenotypes) of the  $-\log_{10}$  univariate  $p$ -values from the earlier release ( $x$ -axis) vs. the later release ( $y$ -axis). Dashed red lines represent the univariate significance GWAS thresholds used for each study's releases. Across all three studies, 84 out of 94 new multivariate associations from the earlier releases have smaller minimum univariate  $p$ -values in the later release, and 68 out of 84 new multivariate associations that did not reach GWAS significance in the earlier release do so in the later release (see Supplementary Table 5 for a per-dataset breakdown).

164 univariate analyses. To illustrate this we examined, in three well-powered stud-  
165 ies, the associations that would be declared significant if the univariate significance  
166 threshold were relaxed, and assessed which of them would also be significant in our  
167 multivariate analysis (i.e. we assess whether, if we go deeper into the univariate re-  
168 sults, we find the same SNPs as appear in our multivariate results). The results are  
169 shown in Figure 3. Although there is, understandably, substantial overlap between  
170 the significant SNPs, any non-trivial relaxation of the univariate threshold includes  
171 many SNPs that are not multivariate significant in our analysis; for example, at

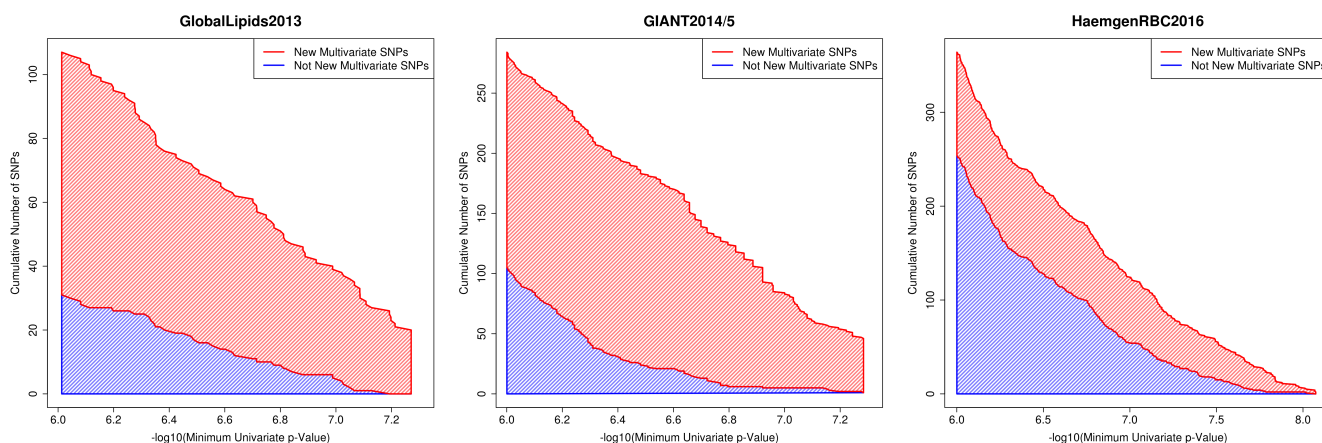

**Figure 3: Comparison of New Multivariate Hits vs. Relaxing Univariate  $p$ -Value Threshold.** For each data set the graph shows how many associations become significant as the univariate  $p$ -value threshold is relaxed (moving from right to left on the  $x$ -axis), and how many of these are declared as new multivariate hits in our analysis. In both cases results are pruned to avoid counting associations of SNPs in strong LD; see Online Methods for details. The appearance of appreciable blue areas indicates that the multivariate analysis is reordering the significance of SNPs compared with performing multiple univariate analyses.

172 a univariate threshold of  $5 \times 10^{-7}$  only 66% of the univariate significant SNPs are  
173 also multivariate significant across these three studies. This demonstrates that,  
174 indeed, our multivariate approach reorders significance of SNPs compared with  
175 multiple univariate analyses.

### 176 **Reanalysis also identifies new univariate associations**

177 During our multivariate reanalyses we noticed many SNPs that appeared to be  
178 genome-wide univariate significant but were – somewhat mysteriously – not re-  
179 ported as such by the original studies (i.e. SNPs whose univariate  $p$ -values crossed  
180 the significance threshold, as defined by the given study, in at least one trait).

181 Supplementary Table 1 reports 79 such associations.

182       There may be many reasons why such variants went unreported, but one rea-  
183 son may be physical proximity to a variant with a stronger signal. Indeed, more  
184 than half of the variants described above are within 1Mb of a previously-reported  
185 univariate GWAS association. Refraining from reporting multiple near-by associa-  
186 tions seems a reasonable – if conservative – strategy to avoid reporting redundant  
187 associations due to LD. Further, even when redundant associations due to LD can  
188 be ruled out (e.g. by directly examining LD rather than by simply using physi-  
189 cal distance), it might be assumed that multiple nearby associated variants may  
190 all act through the same biological mechanism and therefore provide redundant  
191 biological insights. However, we found that multi-phenotype patterns of associa-  
192 tion can differ between nearby SNPs, suggesting that they act through different  
193 mechanisms.

194       To highlight just one example, consider rs7515577 – which is an original uni-  
195 variate association in GlobalLipids2010 – and rs12038699 – which is a new multi-  
196 variate association in GlobalLipids2013. We note that rs12038699 actually reached  
197 univariate genome-wide significance in the GlobalLipids2013 dataset, but was not  
198 reported (Supplementary Table 6). This is possibly because the latter SNP is rel-  
199 atively close, in genomic terms, to the former SNP (549kb). However, these SNPs  
200 are not in strong LD ( $r^2 = .08$ ), and so these associations almost certainly repre-

201 sent non-redundant associations. This is further supported by the effect sizes in  
202 each phenotype, which clearly reveal very different multivariate patterns of effect  
203 sizes among phenotypes (Supplementary Figure 2 & Supplementary Table 6). In-  
204 deed the very different multivariate patterns of effect size suggest that not only are  
205 these associations non-redundant but likely involve different biological mechanisms  
206 as well.

207 These results suggest that, moving forward, it may pay to be more careful  
208 in designing filters designed to avoid reporting redundant associations, and that  
209 multi-phenotype analyses may have a helpful role to play here.

## 210 **Limitations**

211 One goal of the multivariate approach introduced in [Stephens 2013](#) was to increase  
212 interpretability of multivariate analyses; in particular, the goal was to not only  
213 *test* for associations but also to help *explain* the associations by partitioning the  
214 phenotypes into “Unassociated”, “Directly Associated”, and “Indirectly Associated”  
215 categories. In principle one might hope to use these classifications to gain insights  
216 into the relationships among phenotypes and also perhaps to identify different  
217 “types” of multivariate association - effectively clustering associations into different  
218 groups. However, in practice we find that these discrete classifications are often not  
219 as helpful as one might hope. One reason is the difficulty of reliably distinguishing



220 between direct and indirect effects (Stephens, 2013). Another reason is widespread  
221 associations with multiple phenotypes. Indeed, we find that, consistently across  
222 data sets, the most common multivariate models involve associations – either direct  
223 or indirect – with many phenotypes (Supplementary Table 7) and many SNPs  
224 are classified as being associated with many phenotypes (Figure 4A). Further,  
225 SNPs are very rarely confidently classified as “Unassociated” with any phenotype  
226 (Figure 4B). This last observation can be explained by the fact that it is essentially  
227 impossible to distinguish ‘unassociated’ from ‘weakly associated’. Nonetheless  
228 when all SNPs show similar classifications it is difficult to get insights into different  
229 patterns of multivariate association.

230 Moving forward, rather than relying on the discrete classifications of “Unas-  
231 sociated”, “Directly Associated”, and “Indirectly Associated” to identify different  
232 patterns of multivariate association, we believe it will be more fruitful to use  
233 multivariate methods that take a more quantitative approach, such as identifying  
234 different patterns of *effect size* (including direction of effect) among phenotypes  
235 (Urbut et al., 2017). Focusing on effect sizes has the potential to be much more  
236 informative than discrete classification, which can hide effect size differences. For  
237 example, when multiple SNPs are classified as associated with all phenotypes,  
238 they can still show very different patterns of estimated effect sizes/direction (see  
239 Supplementary Figure 3).

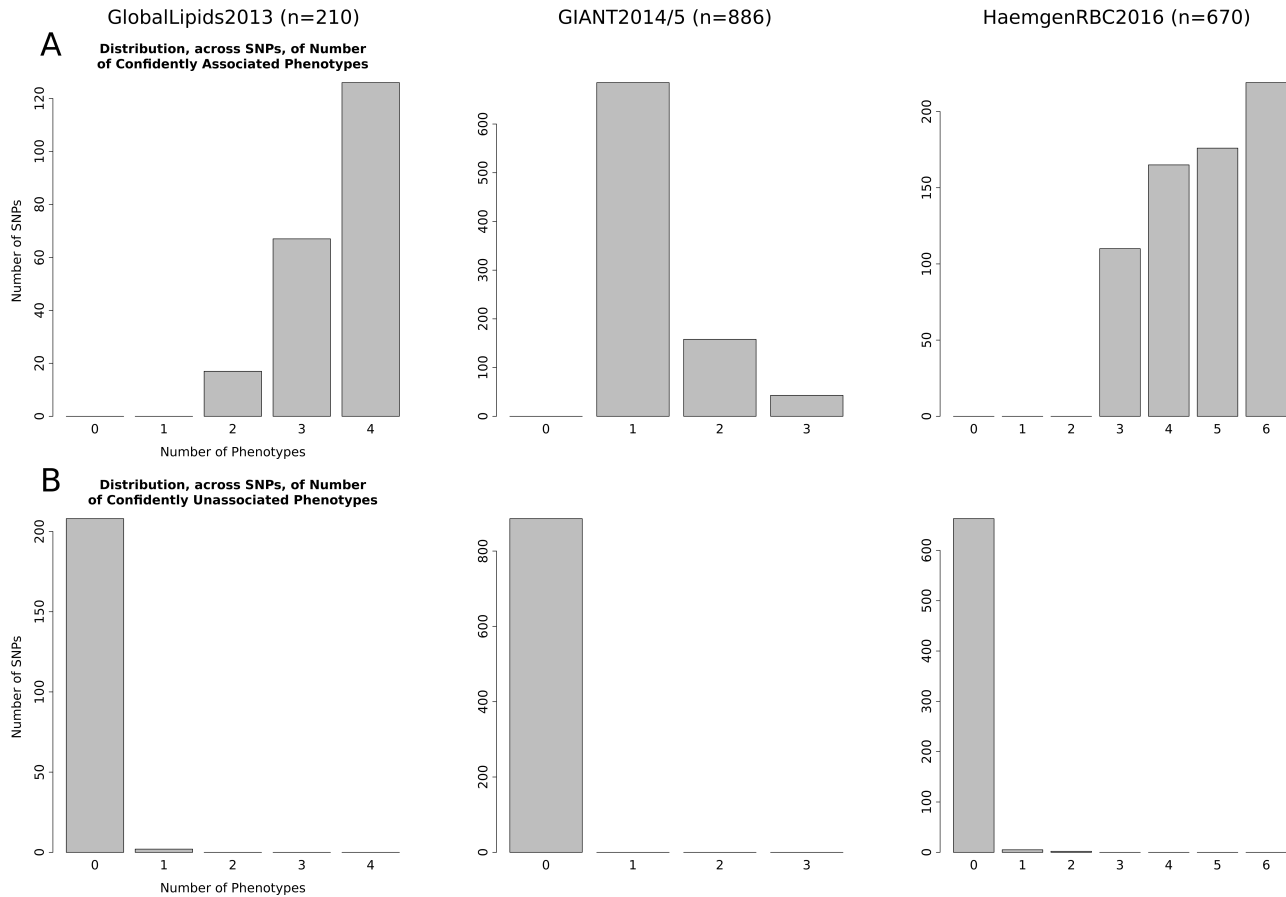

**Figure 4: Distribution, Across Significant SNPs, of Number of Phenotypes That Are Confidently Associated (A) or Confidently Unassociated (B).** Results are shown for three well-powered datasets: GlobalLipids2013, GIANT2014/5, and HaemgenRBC2016. Here “confident” means with probability  $> 0.95$ , so a SNP is considered “confidently associated” with a phenotype if the sum of its probabilities in the “Directly Associated” and “Indirectly Associated” categories exceeds 0.95 (A), and is considered confidently unassociated with the phenotype if this probability is less than 0.05 (B). The set of significant SNPs includes both previous univariate associations and new multivariate associations.

240 Another limitation of our multivariate methods is that they can lead to (what  
241 appear to be) false positive associations when applied to test SNPs with very low  
242 minor allele frequencies. Specifically we saw examples where very low-frequency  
243 SNPs (e.g.  $MAF < .001$ ) showed strong signals of multivariate association despite  
244 showing very little signal in any univariate test. Although such results are not  
245 impossible, we believe that most of these cases were likely false positives, and we  
246 applied a MAF cut-off (of 0.01 or 0.005) to avoid these issues. Consequently we  
247 recommend caution in interpreting results of multivariate analyses at very low-  
248 frequency SNPs, and more generally we recommend that multivariate results be  
249 compared against univariate results to check they make sense – highly significant  
250 multivariate associations that do not also show at least a moderate level of uni-  
251 variate association should be treated with caution.

## 252 4 Discussion

253 We reanalyzed 13 publicly available GWAS datasets using a Bayesian multivari-  
254 ate approach and identified many new genetic associations. Turning genetic as-  
255 sociations into biological discoveries remains, of course, a challenging problem.  
256 Nonetheless, our results suggest that the increased power of multivariate associa-  
257 tion analysis that has been reported in many simulation studies ([Stephens, 2013](#);  
258 [Galesloot et al., 2014](#); [Porter and O'Reilly, 2017](#)) also translates to discovery of

259 many new associations in practice.

260 Our results exploit the public availability of summary data from several large  
261 GWAS. Despite progress toward easier availability of individual-level data for large  
262 studies (Sudlow et al., 2015), in many cases summary data remain much easier  
263 to obtain and work with; there are big practical advantages as well to modular  
264 pipelines that first compute summary data and then use these as inputs to sub-  
265 sequent (more sophisticated) analyses. For example, the multivariate analyses we  
266 present here are simplified by assuming that the summary data were computed  
267 while adequately adjusting for population stratification. And our results illustrate  
268 the potential for reanalysis of summary data to yield novel inferences. In this  
269 regard we also emphasize the importance of consortia releasing carefully-chosen  
270 summaries. For example,  $Z$ -scores are much more helpful than  $p$ -values because  
271 they preserve information on the direction of the effect. Even better would be  
272 both the effect size and standard error that created the  $Z$ -score. More generally,  
273 although not necessarily essential for our analyses here, it is always helpful to in-  
274 clude additional key meta-data (e.g. the reference allele, or effect allele, the minor  
275 allele frequency, and sample size).

276 The specific multivariate methods used here were derived under the assumption  
277 that the summary data from each phenotype has been obtained from the same  
278 sampled individuals (which is true, at least approximately, for studies analyzed

279 here). However, multivariate analysis of summary data is also possible even when  
280 data were obtained from different samples for each phenotype. The main difference  
281 between these settings is that, for data from overlapping samples, the “noise” is  
282 correlated as well as the signal: i.e. the summary data are correlated under the null  
283 due to sample overlap, and correlated under the alternative due to both sample  
284 overlap and any shared genetic effects. In contrast, for data from non-overlapping  
285 samples the noise is uncorrelated (whereas the signal may remain correlated if  
286 genetic factors are shared). Our methods use data at (empirically) null SNPs  
287 to estimate the noise correlation, and so their overall assessment of associations  
288 should be relatively robust to whether samples for different phenotypes overlap  
289 (however, our definitions of **D** (direct) vs **I** (indirect) associations requires the  
290 same samples to be measured across phenotypes.)

291 Moving forward, we expect multivariate association analyses to play an in-  
292 creasingly important role in detecting and understanding genetic associations and  
293 relationships among phenotypes. Large studies are now collecting, and making  
294 available, rich human genetic and phenotypic information on many complex phe-  
295 notypes, most notably the UKBioBank ([Sudlow et al., 2015](#)). In addition, there  
296 are increasingly large studies linking genetic variation and molecular phenotypes  
297 such as gene expression (e.g. the GTEx project ([GTEx Consortium, 2013](#))), as  
298 well as epigenetic modifications and transcript degradation ([Gaffney, 2013](#); [Pai](#)

299 [et al., 2015](#); [Birney et al., 2016](#); [Stricker et al., 2017](#)). Analysis of multiple molec-  
300 ular traits can help yield insights into causal connections among traits ([Li et al.,](#)  
301 [2016](#)), and joint analysis of molecular traits with complex phenotypes may also  
302 shed light on functional mechanisms (as in “co-localization” analyses ([Hormozdiari](#)  
303 [et al., 2016](#); [Li and Kellis, 2016](#); [Zhu et al., 2016](#); [Wen et al., 2017](#))). Even simply  
304 moving from single phenotype to pairwise analysis can shed considerable light on  
305 sharing of genetic effects and possible causal connections ([Pickrell et al., 2016](#); [Shi](#)  
306 [et al., 2017](#)).

307     These increasingly-complex new data also bring new analytic and computa-  
308 tional challenges. Here we have restricted our analyses to relatively small sets  
309 of closely-related traits, and indeed the specific multivariate framework we used  
310 here – which performs an exhaustive search over all possible multivariate models  
311 – is fully tractable for only moderate numbers of traits (up to about 10). Scal-  
312 ing methods up to dealing with larger number of traits may well be helpful for  
313 some settings, and recent multivariate analysis methods can deal with dozens of  
314 outcomes ([Dahl et al., 2016](#); [Urbut et al., 2017](#)). In addition, developing multivari-  
315 ate methods to perform *fine-mapping* of genetic associations simultaneously across  
316 multiple phenotypes ([Lewin et al., 2016](#)) seems an important and challenging area  
317 for future work.

## 318 5 URLs

319 bmass R package: <https://github.com/mturchin20/bmass>

## 320 6 Acknowledgments

321 We thank John Novembre, Anna Di Rienzo, and Xin He for helpful feedback  
322 during the development of this project. We also thank Peter Carbonetto for helpful  
323 feedback on the bmass R package and the manuscript. This work was supported  
324 by National Institutes of Health (NIH) Grant R01 HG002585 to MS, NIH Grants  
325 T32 GM007197, TL1 TR000432, and F31 AI118375 to MCT, and NIH Grant R01  
326 GM118652.

## 327 7 Author Contributions

328 MS conceived the original statistical framework. MS and MCT conceived the study  
329 design. MCT performed the data collection, processing, and analyses. MCT wrote  
330 the R package bmass. MS supervised the project. MCT and MS wrote the paper.

## 331 8 Materials and Methods

### 332 8.1 GWAS Datasets

333 Below are specific details regarding retrieval and data-processing for each dataset  
334 analyzed. Where applicable, these details include the sample size ( $N$ ), minor allele  
335 frequency (MAF), and  $p$ -value thresholds that were applied (based on the thresh-  
336 olds used in the original publications). For each dataset variants were dropped if  
337 they satisfied at least one of the following criteria: did not contain information for  
338 every phenotype; had missing MAF; were fixed (MAF of 0); had effect size exactly  
339 0 (i.e. direction of effect would be indeterminable); or did not contain the same  
340 reference and alternative alleles across each phenotype. For a handful of studies,  
341 external databases were used to retrieve chromosome, basepair information, and  
342 MAF based on rsID#; in these studies SNPs for which this information could not  
343 be retrieved were also dropped.

344 **GlobalLipids2010 (Teslovich et al., 2010):** Original merged, processed,  
345 and GWAS-hit annotated summary data from Stephens 2013 (Stephens, 2013) for  
346 HDL, LDL, TG, and TC was downloaded from [https://github.com/stephens999/](https://github.com/stephens999/multivariate)  
347 [multivariate](#) (*dtlesssignif.annot.txt* and *RSS0.txt*).

348 **GlobalLipids2013 (Willer et al., 2013):** Summary data for HDL, LDL,  
349 TG, and TC was downloaded from <http://csg.sph.umich.edu/abecasis/public/>



350 [lipids2013/](#). We used a minimum  $N$  threshold of 50,000, a MAF threshold of  
351 1%, and a univariate significant GWAS  $p$ -value threshold of  $5 \times 10^{-8}$ . All vari-  
352 ants were oriented to the HDL minor allele. The final merged and QC'd datafile  
353 contained 2,004,701 SNPs. rsID#'s of published GWAS SNPs were retrieved for  
354 all four phenotypes from [https://www.nature.com/ng/journal/v45/n11/full/  
355 ng.2797.html](https://www.nature.com/ng/journal/v45/n11/full/ng.2797.html) via Supplementary Tables 2 and 3.

356 **GIANT2010 (Lango Allen et al., 2010; Speliotes et al., 2010; Heid  
357 et al., 2010)**: Summary data for Height, BMI, and WHRadjBMI were down-  
358 loaded from [https://www.broadinstitute.org/collaboration/giant/index.  
359 php/GIANT\\_consortium\\_data\\_files](https://www.broadinstitute.org/collaboration/giant/index.php/GIANT_consortium_data_files). We used a minimum  $N$  threshold of 50,000,  
360 a MAF threshold of 1%, and a univariate significant GWAS  $p$ -value threshold of  
361  $5 \times 10^{-8}$ . Chromosome and basepair position per variant were retrieved from  
362 dbSNP130 (Sherry et al., 2001). All variants were oriented to the Height minor  
363 allele. The final merged and QC'ed datafile contained 2,363,881 SNPs. rsID#'s  
364 of published GWAS SNPs were retrieved for Height from [https://www.nature.  
365 com/nature/journal/v467/n7317/full/nature09410.html](https://www.nature.com/nature/journal/v467/n7317/full/nature09410.html) via Supplementary  
366 Table 1, for BMI from [https://www.nature.com/ng/journal/v42/n11/full/  
367 ng.686.html](https://www.nature.com/ng/journal/v42/n11/full/ng.686.html) via Table 1, and for WHRadjBMI from [https://www.nature.com/  
368 ng/journal/v42/n11/full/ng.685.html](https://www.nature.com/ng/journal/v42/n11/full/ng.685.html) via Table 1.

369 **GIANT2014/5 (Wood et al., 2014; Locke et al., 2015; Shungin et al.,**

370 **2015**): Summary data for Height, BMI, and WHRadjBMI were downloaded from  
371 [https://www.broadinstitute.org/collaboration/giant/index.php/GIANT\\_consortium\\_](https://www.broadinstitute.org/collaboration/giant/index.php/GIANT_consortium_data_files)  
372 [data\\_files](#). We used a minimum  $N$  threshold of 50,000, a MAF threshold of 1%,  
373 and a univariate significant GWAS  $p$ -value threshold of  $5 \times 10^{-8}$ . Chromosome  
374 and basepair position per variant were retrieved from dbSNP130 (Sherry et al.,  
375 2001). All variants were oriented to the Height minor allele. The final merged and  
376 QC'ed datafile contained 2,340,715 SNPs. rsID#'s of published GWAS SNPs were  
377 retrieved for Height from [https://www.nature.com/ng/journal/v46/n11/full/](https://www.nature.com/ng/journal/v46/n11/full/ng.3097.html)  
378 [ng.3097.html](#) via Supplementary Table 1, for BMI from [https://www.nature.](https://www.nature.com/nature/journal/v518/n7538/full/nature14177.html)  
379 [com/nature/journal/v518/n7538/full/nature14177.html](#) via Supplementary  
380 Tables 1 and 2, and for WHRadjBMI from [https://www.nature.com/nature/](https://www.nature.com/nature/journal/v518/n7538/full/nature14132.html)  
381 [journal/v518/n7538/full/nature14132.html](#) via Supplementary Table 4.

382 **HaemgenRBC2012 (van der Harst et al., 2012)**: Summary data for RBC,  
383 PCV, MCV, MCH, MCHC, and Hb were downloaded from the European Genome-  
384 Phenome Archive via accession number EGAS00000000132 ([https://www.ebi.](https://www.ebi.ac.uk/ega/studies/EGAS00000000132)  
385 [ac.uk/ega/studies/EGAS00000000132](#)). We used a minimum  $N$  threshold of  
386 10,000, a MAF threshold of 1%, and a univariate significant GWAS  $p$ -value thresh-  
387 old of  $1 \times 10^{-8}$ . Chromosome, basepair position, and MAF per variant were  
388 retrieved from HapMap release 22 (International HapMap, 2003). All variants  
389 were oriented to the RBC minor allele. The final merged and QC'ed datafile

390 contained 2,327,567 SNPs. rsID#'s of published GWAS SNPs were retrieved  
391 for all six phenotypes from [https://www.nature.com/nature/journal/v492/  
392 n7429/full/nature11677.html](https://www.nature.com/nature/journal/v492/n7429/full/nature11677.html) via Table 1.

393 **HaemgenRBC2016 (Astle et al., 2016)**: Summary data for RBC, PCV,  
394 MCV, MCH, MCHC, and Hb were shared via personal communication with the  
395 authors. We used a MAF threshold of 1% and a univariate significant GWAS  $p$ -  
396 value threshold of  $8.319 \times 10^{-9}$ . Since sample size was not provided per variant, the  
397 following overall study sample sizes were used as proxies per phenotype: 172,952 for  
398 RBC, 172,433 for PCV, 173,039 for MCV, 172,332 for MCH, for 172,925 MCHC,  
399 and 172,851 for Hb. All variants were oriented to the RBC minor allele. Only SNPs  
400 were analyzed. The final merged and QC'ed datafile contained 8,649,095 SNPs.  
401 We then used these summary data to create a list of (non-redundant) "Previous  
402 univariate associations". This was done separately for each phenotype by collecting  
403 all SNPs that exceeded the univariate significant GWAS  $p$ -value threshold and  
404 greedily pruning the SNPs: i.e. we went down the list, removing SNPs that were  
405 less significant than another SNP within 500kb. The pruned lists of previous  
406 univariate associations for each phenotype were then combined to produce the  
407 final SNP list of "published GWAS results". Published CNVs that tagged regions  
408 that were not identified by this 'final published SNP list' were also included to  
409 avoid erroneously claiming downstream a region as a 'new unpublished result';

410 these CNVs however were only used to mask additional loci as being ‘nearby a  
411 published univariate GWAS result’ and for nothing else in the `bmass` analysis  
412 pipeline.

413 **ICBP2011 (International Consortium for Blood Pressure Genome-**  
414 **Wide Association et al., 2011; Wain et al., 2011)**: Summary data for  
415 SBP, DBP, PP, and MAP were downloaded from dbGaP via accession number  
416 phs000585.v1.p1 ([https://www.ncbi.nlm.nih.gov/projects/gap/cgi-bin/study.](https://www.ncbi.nlm.nih.gov/projects/gap/cgi-bin/study.cgi?study_id=phs000585.v1.p1)  
417 [cgi?study\\_id=phs000585.v1.p1](https://www.ncbi.nlm.nih.gov/projects/gap/cgi-bin/study.cgi?study_id=phs000585.v1.p1)). We used a minimum  $N$  threshold of 10,000, a  
418 MAF threshold of 1%, and a univariate significant GWAS  $p$ -value threshold of  $5 \times$   
419  $10^{-8}$ . Chromosome and basepair position per variant were retrieved from HapMap  
420 release 21 ([International HapMap, 2003](#)). All variants were oriented to the SBP mi-  
421 nor allele. The final merged and QC’ed datafile contained 2,387,851 SNPs. rsID#’s  
422 of published GWAS SNPs were retrieved for SBP and DBP from [https://www.](https://www.nature.com/nature/journal/v478/n7367/full/nature10405.html)  
423 [nature.com/nature/journal/v478/n7367/full/nature10405.html](https://www.nature.com/nature/journal/v478/n7367/full/nature10405.html) via Supple-  
424 mentary Table 5, and for PP and MAP from [https://www.nature.com/ng/journal/](https://www.nature.com/ng/journal/v43/n10/full/ng.922.html)  
425 [v43/n10/full/ng.922.html](https://www.nature.com/ng/journal/v43/n10/full/ng.922.html) via Table 1 and Supplementary Table 2F. Addition-  
426 ally, we gratefully acknowledge the International Consortium for Blood Pressure  
427 Genome-Wide Association Studies (Nature. 2011 Sep 11;478(7367):103-9, Nat  
428 Genet. 2011 Sep 11;43(10):1005-11) for generating and sharing these data.

429 **MAGIC2010 (Dupuis et al., 2010)**: Summary data for FstIns, FstGlu,

430 HOMA\_B, and HOMA\_IR were downloaded from <https://www.magicinvestigators.org/downloads/>. We used a MAF threshold of 1% and a univariate significant  
431 GWAS  $p$ -value threshold of  $5 \times 10^{-8}$ . Since sample size was not provided per  
432 variant, the overall study sample size of 46,186 was used as a proxy. Chromo-  
433 some and basepair position per variant were retrieved from HapMap release 22  
434 ([International HapMap, 2003](#)). All variants were oriented to the FstIns minor  
435 allele. The final merged and QC'ed datafile contained 2,333,328 SNPs. rsID#'s  
436 of published GWAS SNPs were retrieved for all four phenotypes from <https://www.nature.com/ng/journal/v42/n2/full/ng.520.html>  
437 via Table 1.

439 **GEFOS2015 ([Zheng et al., 2015](#))**: Summary data for FA, FN, and LS were  
440 downloaded from <http://www.gefos.org/?q=content/data-release-2015>. We  
441 used a MAF threshold of .5% and a univariate significant GWAS  $p$ -value threshold  
442 of  $1.2 \times 10^{-8}$ . Since sample size was not provided per variant, the overall study sam-  
443 ple size of 32,965 was used as a proxy. All variants were oriented to the FA minor  
444 allele. The final merged and QC'ed datafile contained 8,938,035 SNPs. rsID#'s of  
445 published GWAS SNPs were retrieved for all four phenotypes from <https://www.nature.com/nature/journal/v526/n7571/full/nature14878.html>  
446 via Supple-  
447 mentary Table 13.

448 **GIS2014 ([Benyamin et al., 2014](#))**: Summary data for Iron, Sat, TrnsFrn,  
449 and Log10Frtn were shared via personal communication with the authors. We

450 used a MAF threshold of 1% and a univariate significant GWAS  $p$ -value threshold  
451 of  $5 \times 10^{-8}$ . Since sample size was not provided per variant, the overall study  
452 sample size of 48,972 was used as a proxy. All variants were oriented to the Iron  
453 minor allele. The final merged and QC'ed datafile contained 1,985,313 SNPs.  
454 rsID#'s of published GWAS SNPs were retrieved for all four phenotypes from  
455 <https://www.nature.com/articles/ncomms5926/> via Table 1.

456 **SSGAC2016 (Barban et al., 2016)**: Summary data for NEB\_Pooled and  
457 AFB\_Pooled were downloaded from <https://www.thessgac.org/data>. We used  
458 a MAF threshold of 1% and a univariate significant GWAS  $p$ -value threshold of  
459  $5 \times 10^{-8}$ . Since sample size was not provided per variant, the following overall  
460 study sample sizes were used as proxies per phenotype: 251,151 for NEB\_Pooled  
461 and 343,072 for AFB\_Pooled. All variants were oriented to the NEB\_Pooled  
462 minor allele. The final merged and QC'ed datafile contained 2,395,561 SNPs.  
463 rsID#'s of published GWAS SNPs were retrieved for all four phenotypes from  
464 <https://www.nature.com/ng/journal/v48/n12/full/ng.3698.html> via Table  
465 1.

466 **CKDGen2010/1 (Kottgen et al., 2010; Boger et al., 2011)**: Summary  
467 data for Crea, Cys, CKD, UACR, and MA were downloaded from [https://www.](https://www.nhlbi.nih.gov/research/intramural/researchers/pi/fox-caroline/datasets)  
468 [nhlbi.nih.gov/research/intramural/researchers/pi/fox-caroline/datasets](https://www.nhlbi.nih.gov/research/intramural/researchers/pi/fox-caroline/datasets).  
469 We used a MAF threshold of 1% and a univariate significant GWAS  $p$ -value thresh-

470 old of  $5 \times 10^{-8}$ . Since sample size was not provided per variant, the following  
471 overall study sample sizes were used as proxies per phenotype: 67,093 for Crea,  
472 20,957 for Cys, 62,237 for CKD, 31,580 for UACR, and 30,482 for MA. All vari-  
473 ants were oriented to the Crea minor allele. The final merged and QC'ed datafile  
474 contained 2,333,498 SNPs. rsID#'s of published GWAS SNPs were retrieved for  
475 Crea, Cys, and CKD from [https://www.nature.com/ng/journal/v42/n5/full/  
476 ng.568.html](https://www.nature.com/ng/journal/v42/n5/full/ng.568.html) via Table 2.

477 **ENIGMA22015 (Hibar et al., 2015)**: Summary data for ICV, Accum-  
478 bens, Amygdala, Caudate, Hippocampus, Pallidum, Putamen, and Thalamus were  
479 downloaded from <http://enigma.ini.usc.edu/research/download-enigma-gwas-results/>.  
480 We used a minimum  $N$  threshold of 10,000, a MAF threshold of 1% and a uni-  
481 variate significant GWAS  $p$ -value threshold of  $5 \times 10^{-8}$ . All variants were oriented  
482 to the ICV minor allele. The final merged and QC'ed datafile contained 6,271,117  
483 SNPs. rsID#'s of published GWAS SNPs were retrieved for all 8 phenotypes from  
484 <https://www.nature.com/nature/journal/v520/n7546/full/nature14101.html>  
485 via Table 1.

## 486 8.2 bmass

487 **bmass** implements in an R package the statistical methods described in [Stephens](#)  
488 [2013](#), which should be consulted for full details. In particular, the sections “Com-

489 putation” and “Detailed Methods (Global Lipids Analysis)” in [Stephens 2013](#) de-  
490 scribe how multivariate analyses are applied to GWAS summary data, and `bmss`  
491 implements the data analysis pipeline described in the “Detailed Methods (Global  
492 Lipids Analysis)” section. The `bmss` R package also includes two vignettes to help  
493 users begin processing GWAS summary data and implementing these methods.

### 494 **8.3 Additional Details for Figure 3**

495 For each dataset we made a list of “marginally-significant” SNPs, with  $p$ -values  
496 smaller than  $1 \times 10^{-6}$  but not genome-wide significant at the relevant datasets’  
497 GWAS threshold. We then greedily pruned these lists of marginally-significant  
498 SNPs: that is we repeatedly went through the lists removing SNPs that were less  
499 significant than another SNP within 500kb. We then removed any SNPs that were  
500 within 500kb of a new multivariate association, and merged the resulting list with  
501 the list of new multivariate associations, and sorted this merged list of SNPs by  
502 their minimum univariate  $p$ -value.

503 This results in a non-redundant list of marginally-significant SNPs – some of  
504 which are new multivariate associations and some of which are not – sorted by  
505 their smallest univariate  $p$ -value. The plot shows how the number of SNPs of each  
506 type varies as the  $p$ -value threshold is relaxed from the GWAS threshold to  $10^{-6}$   
507 (the HaemgenRBC2016 results show only the top 500 SNPs due to the abundance



508 of SNPs between  $8.31 \times 10^{-9}$  and  $1 \times 10^{-6}$ ).

## 509 References

- 510 Astle, W. J., Elding, H., Jiang, T., Allen, D., Ruklisa, D., Mann, A. L., Mead,  
511 D., Bouman, H., Riveros-Mckay, F., Kostadima, M. A., Lambourne, J. J., Siva-  
512 palaratnam, S., Downes, K., Kundu, K., Bomba, L., Berentsen, K., Bradley,  
513 J. R., Daugherty, L. C., Delaneau, O., Freson, K., Garner, S. F., Grassi,  
514 L., Guerrero, J., Haimel, M., Janssen-Megens, E. M., Kaan, A., Kamat, M.,  
515 Kim, B., Mandoli, A., Marchini, J., Martens, J. H., Meacham, S., Megy, K.,  
516 O'Connell, J., Petersen, R., Sharifi, N., Sheard, S. M., Staley, J. R., Tuna, S.,  
517 van der Ent, M., Walter, K., Wang, S. Y., Wheeler, E., Wilder, S. P., Iotchkova,  
518 V., Moore, C., Sambrook, J., Stunnenberg, H. G., Di Angelantonio, E., Kaptoge,  
519 S., Kuijpers, T. W., Carrillo-de Santa-Pau, E., Juan, D., Rico, D., Valencia, A.,  
520 Chen, L., Ge, B., Vasquez, L., Kwan, T., Garrido-Martin, D., Watt, S., Yang,  
521 Y., Guigo, R., Beck, S., Paul, D. S., Pastinen, T., Bujold, D., Bourque, G.,  
522 Frontini, M., Danesh, J., Roberts, D. J., Ouwehand, W. H., Butterworth, A. S.,  
523 and Soranzo, N. (2016). The allelic landscape of human blood cell trait variation  
524 and links to common complex disease. *Cell*, 167(5):1415–1429 e19.
- 525 Barban, N., Jansen, R., de Vlaming, R., Vaez, A., Mandemakers, J. J., Tropf,  
526 F. C., Shen, X., Wilson, J. F., Chasman, D. I., Nolte, I. M., Tragante, V.,

527 van der Laan, S. W., Perry, J. R., Kong, A., Consortium, B., Ahluwalia, T. S.,  
528 Albrecht, E., Yerges-Armstrong, L., Atzmon, G., Auro, K., Ayers, K., Bakshi,  
529 A., Ben-Avraham, D., Berger, K., Bergman, A., Bertram, L., Bielak, L. F.,  
530 Bjornsdottir, G., Bonder, M. J., Broer, L., Bui, M., Barbieri, C., Cavadino,  
531 A., Chavarro, J. E., Turman, C., Concas, M. P., Cordell, H. J., Davies, G.,  
532 Eibich, P., Eriksson, N., Esko, T., Eriksson, J., Falahi, F., Felix, J. F., Fontana,  
533 M. A., Franke, L., Gandin, I., Gaskins, A. J., Gieger, C., Gunderson, E. P.,  
534 Guo, X., Hayward, C., He, C., Hofer, E., Huang, H., Joshi, P. K., Kanoni, S.,  
535 Karlsson, R., Kiechl, S., Kifley, A., Kluttig, A., Kraft, P., Lagou, V., Lecoeur,  
536 C., Lahti, J., Li-Gao, R., Lind, P. A., Liu, T., Makalic, E., Mamasoula, C.,  
537 Matteson, L., Mbarek, H., McArdle, P. F., McMahon, G., Meddens, S. F.,  
538 Mihailov, E., Miller, M., Missmer, S. A., Monnereau, C., van der Most, P. J.,  
539 Myhre, R., Nalls, M. A., Nutile, T., Kalafati, I. P., Porcu, E., Prokopenko,  
540 I., Rajan, K. B., Rich-Edwards, J., Rietveld, C. A., Robino, A., Rose, L. M.,  
541 Rueedi, R., Ryan, K. A., Saba, Y., Schmidt, D., Smith, J. A., Stolk, L., Streeten,  
542 E., Tonjes, A., Thorleifsson, G., et al. (2016). Genome-wide analysis identifies  
543 12 loci influencing human reproductive behavior. *Nat Genet*, 48(12):1462–1472.

544 Benyamin, B., Esko, T., Ried, J. S., Radhakrishnan, A., Vermeulen, S. H., Traglia,  
545 M., Gogele, M., Anderson, D., Broer, L., Podmore, C., Luan, J., Kutalik, Z.,  
546 Sanna, S., van der Meer, P., Tanaka, T., Wang, F., Westra, H. J., Franke, L.,

547 Mihailov, E., Milani, L., Halldin, J., Winkelmann, J., Meitinger, T., Thiery, J.,  
548 Peters, A., Waldenberger, M., Rendon, A., Jolley, J., Sambrook, J., Kiemeny,  
549 L. A., Sweep, F. C., Sala, C. F., Schwienbacher, C., Pichler, I., Hui, J.,  
550 Demirkan, A., Isaacs, A., Amin, N., Steri, M., Waeber, G., Verweij, N., Pow-  
551 ell, J. E., Nyholt, D. R., Heath, A. C., Madden, P. A., Visscher, P. M., Wright,  
552 M. J., Montgomery, G. W., Martin, N. G., Hernandez, D., Bandinelli, S., van der  
553 Harst, P., Uda, M., Vollenweider, P., Scott, R. A., Langenberg, C., Wareham,  
554 N. J., InterAct, C., van Duijn, C., Beilby, J., Pramstaller, P. P., Hicks, A. A.,  
555 Ouwehand, W. H., Oexle, K., Gieger, C., Metspalu, A., Camaschella, C., To-  
556 niolo, D., Swinkels, D. W., and Whitfield, J. B. (2014). Novel loci affecting iron  
557 homeostasis and their effects in individuals at risk for hemochromatosis. *Nat*  
558 *Commun*, 5:4926.

559 Birney, E., Smith, G. D., and Greally, J. M. (2016). Epigenome-wide association  
560 studies and the interpretation of disease -omics. *PLoS Genet*, 12(6):e1006105.

561 Boger, C. A., Chen, M. H., Tin, A., Olden, M., Kottgen, A., de Boer, I. H., Fuchs-  
562 berger, C., O'Seaghdha, C. M., Pattaro, C., Teumer, A., Liu, C. T., Glazer,  
563 N. L., Li, M., O'Connell, J. R., Tanaka, T., Peralta, C. A., Kutalik, Z., Luan,  
564 J., Zhao, J. H., Hwang, S. J., Akyzbekova, E., Kramer, H., van der Harst, P.,  
565 Smith, A. V., Lohman, K., de Andrade, M., Hayward, C., Kollerits, B., Tonjes,  
566 A., Aspelund, T., Ingelsson, E., Eiriksdottir, G., Launer, L. J., Harris, T. B.,

567 Shuldiner, A. R., Mitchell, B. D., Arking, D. E., Franceschini, N., Boerwinkle,  
568 E., Egan, J., Hernandez, D., Reilly, M., Townsend, R. R., Lumley, T., Siscovick,  
569 D. S., Psaty, B. M., Kestenbaum, B., Haritunians, T., Bergmann, S., Vollen-  
570 weider, P., Waeber, G., Mooser, V., Waterworth, D., Johnson, A. D., Florez,  
571 J. C., Meigs, J. B., Lu, X., Turner, S. T., Atkinson, E. J., Leak, T. S., Aasarod,  
572 K., Skorpen, F., Syvanen, A. C., Illig, T., Baumert, J., Koenig, W., Kramer,  
573 B. K., Devuyst, O., Mychaleckyj, J. C., Minelli, C., Bakker, S. J., Kedenko, L.,  
574 Paulweber, B., Coassin, S., Endlich, K., Kroemer, H. K., Biffar, R., Stracke,  
575 S., Volzke, H., Stumvoll, M., Magi, R., Campbell, H., Vitart, V., Hastie, N. D.,  
576 Gudnason, V., Kardia, S. L., Liu, Y., Polasek, O., Curhan, G., Kronenberg, F.,  
577 Prokopenko, I., Rudan, I., Arnlov, J., Hallan, S., Navis, G., Consortium, C. K.,  
578 Parsa, A., Ferrucci, L., Coresh, J., Shlipak, M. G., et al. (2011). Cubn is a gene  
579 locus for albuminuria. *J Am Soc Nephrol*, 22(3):555–70.

580 Dahl, A., Iotchkova, V., Baud, A., Johansson, A., Gyllensten, U., Soranzo, N.,  
581 Mott, R., Kranis, A., and Marchini, J. (2016). A multiple-phenotype imputation  
582 method for genetic studies. *Nat Genet*, 48(4):466–72.

583 Dupuis, J., Langenberg, C., Prokopenko, I., Saxena, R., Soranzo, N., Jackson,  
584 A. U., Wheeler, E., Glazer, N. L., Bouatia-Naji, N., Gloyn, A. L., Lindgren,  
585 C. M., Magi, R., Morris, A. P., Randall, J., Johnson, T., Elliott, P., Rybin, D.,  
586 Thorleifsson, G., Steinthorsdottir, V., Henneman, P., Grallert, H., Dehghan, A.,

587 Hottenga, J. J., Franklin, C. S., Navarro, P., Song, K., Goel, A., Perry, J. R.,  
588 Egan, J. M., Lajunen, T., Grarup, N., Sparso, T., Doney, A., Voight, B. F.,  
589 Stringham, H. M., Li, M., Kanoni, S., Shrader, P., Cavalcanti-Proenca, C., Ku-  
590 mari, M., Qi, L., Timpson, N. J., Gieger, C., Zabena, C., Rocheleau, G., Ingels-  
591 son, E., An, P., O'Connell, J., Luan, J., Elliott, A., McCarroll, S. A., Payne, F.,  
592 Roccasecca, R. M., Pattou, F., Sethupathy, P., Ardlie, K., Ariyurek, Y., Balkau,  
593 B., Barter, P., Beilby, J. P., Ben-Shlomo, Y., Benediktsson, R., Bennett, A. J.,  
594 Bergmann, S., Bochud, M., Boerwinkle, E., Bonnefond, A., Bonnycastle, L. L.,  
595 Borch-Johnsen, K., Bottcher, Y., Brunner, E., Bumpstead, S. J., Charpentier,  
596 G., Chen, Y. D., Chines, P., Clarke, R., Coin, L. J., Cooper, M. N., Cornelis, M.,  
597 Crawford, G., Crisponi, L., Day, I. N., de Geus, E. J., Delplanque, J., Dina, C.,  
598 Erdos, M. R., Fedson, A. C., Fischer-Rosinsky, A., Forouhi, N. G., Fox, C. S.,  
599 Frants, R., Franzosi, M. G., Galan, P., Goodarzi, M. O., Graessler, J., Groves,  
600 C. J., Grundy, S., Gwilliam, R., Gyllensten, U., Hadjadj, S., et al. (2010). New  
601 genetic loci implicated in fasting glucose homeostasis and their impact on type  
602 2 diabetes risk. *Nat Genet*, 42(2):105–16.

603 Gaffney, D. J. (2013). Global properties and functional complexity of human gene  
604 regulatory variation. *PLoS Genet*, 9(5):e1003501.

605 Galesloot, T. E., van Steen, K., Kiemeny, L. A., Janss, L. L., and Vermeulen,  
606 S. H. (2014). A comparison of multivariate genome-wide association methods.

607 *PLoS One*, 9(4):e95923.

608 Genomes Project, C., Auton, A., Brooks, L. D., Durbin, R. M., Garrison, E. P.,  
609 Kang, H. M., Korbelt, J. O., Marchini, J. L., McCarthy, S., McVean, G. A., and  
610 Abecasis, G. R. (2015). A global reference for human genetic variation. *Nature*,  
611 526(7571):68–74.

612 GTEx Consortium, T. (2013). The genotype-tissue expression (gtex) project. *Nat*  
613 *Genet*, 45(6):580–5.

614 Heid, I. M., Jackson, A. U., Randall, J. C., Winkler, T. W., Qi, L., Steinthorsdottir,  
615 V., Thorleifsson, G., Zillikens, M. C., Speliotes, E. K., Magi, R., Workalemahu,  
616 T., White, C. C., Bouatia-Naji, N., Harris, T. B., Berndt, S. I., Ingelsson, E.,  
617 Willer, C. J., Weedon, M. N., Luan, J., Vedantam, S., Esko, T., Kilpelainen,  
618 T. O., Kutalik, Z., Li, S., Monda, K. L., Dixon, A. L., Holmes, C. C., Kaplan,  
619 L. M., Liang, L., Min, J. L., Moffatt, M. F., Molony, C., Nicholson, G., Schadt,  
620 E. E., Zondervan, K. T., Feitosa, M. F., Ferreira, T., Lango Allen, H., Weyant,  
621 R. J., Wheeler, E., Wood, A. R., Magic, Estrada, K., Goddard, M. E., Lettre,  
622 G., Mangino, M., Nyholt, D. R., Purcell, S., Smith, A. V., Visscher, P. M., Yang,  
623 J., McCarroll, S. A., Nemes, J., Voight, B. F., Absher, D., Amin, N., Aspelund,  
624 T., Coin, L., Glazer, N. L., Hayward, C., Heard-Costa, N. L., Hottenga, J. J.,  
625 Johansson, A., Johnson, T., Kaakinen, M., Kapur, K., Ketkar, S., Knowles,  
626 J. W., Kraft, P., Kraja, A. T., Lamina, C., Leitzmann, M. F., McKnight, B.,

627 Morris, A. P., Ong, K. K., Perry, J. R., Peters, M. J., Polasek, O., Prokopenko,  
628 I., Rayner, N. W., Ripatti, S., Rivadeneira, F., Robertson, N. R., Sanna, S.,  
629 Sovio, U., Surakka, I., Teumer, A., van Wingerden, S., Vitart, V., Zhao, J. H.,  
630 Cavalcanti-Proenca, C., Chines, P. S., Fisher, E., Kulzer, J. R., Lecoeur, C.,  
631 Narisu, N., Sandholt, C., Scott, L. J., Silander, K., Stark, K., et al. (2010). Meta-  
632 analysis identifies 13 new loci associated with waist-hip ratio and reveals sexual  
633 dimorphism in the genetic basis of fat distribution. *Nat Genet*, 42(11):949–60.

634 Hibar, D. P., Stein, J. L., Renteria, M. E., Arias-Vasquez, A., Desrivieres, S.,  
635 Jahanshad, N., Toro, R., Wittfeld, K., Abramovic, L., Andersson, M., Aribisala,  
636 B. S., Armstrong, N. J., Bernard, M., Bohlken, M. M., Boks, M. P., Bralten,  
637 J., Brown, A. A., Chakravarty, M. M., Chen, Q., Ching, C. R., Cuellar-Partida,  
638 G., den Braber, A., Giddaluru, S., Goldman, A. L., Grimm, O., Guadalupe, T.,  
639 Hass, J., Woldehawariat, G., Holmes, A. J., Hoogman, M., Janowitz, D., Jia, T.,  
640 Kim, S., Klein, M., Kraemer, B., Lee, P. H., Olde Loohuis, L. M., Luciano, M.,  
641 Macare, C., Mather, K. A., Mattheisen, M., Milaneschi, Y., Nho, K., Pampmeyer,  
642 M., Ramasamy, A., Risacher, S. L., Roiz-Santianez, R., Rose, E. J., Salami, A.,  
643 Samann, P. G., Schmaal, L., Schork, A. J., Shin, J., Strike, L. T., Teumer, A.,  
644 van Donkelaar, M. M., van Eijk, K. R., Walters, R. K., Westlye, L. T., Whelan,  
645 C. D., Winkler, A. M., Zwiers, M. P., Alhusaini, S., Athanasiu, L., Ehrlich, S.,  
646 Hakobjan, M. M., Hartberg, C. B., Haukvik, U. K., Heister, A. J., Hoehn, D.,

647 Kasperaviciute, D., Liewald, D. C., Lopez, L. M., Makkinje, R. R., Matarin,  
648 M., Naber, M. A., McKay, D. R., Needham, M., Nugent, A. C., Putz, B., Royle,  
649 N. A., Shen, L., Sprooten, E., Trabzuni, D., van der Marel, S. S., van Hulzen,  
650 K. J., Walton, E., Wolf, C., Almasy, L., Ames, D., Arepalli, S., Assareh, A. A.,  
651 Bastin, M. E., Brodaty, H., Bulayeva, K. B., Carless, M. A., Cichon, S., Corvin,  
652 A., Curran, J. E., Cizsch, M., et al. (2015). Common genetic variants influence  
653 human subcortical brain structures. *Nature*, 520(7546):224–9.

654 Hormozdiari, F., van de Bunt, M., Segre, A. V., Li, X., Joo, J. W. J., Bilow, M.,  
655 Sul, J. H., Sankararaman, S., Pasaniuc, B., and Eskin, E. (2016). Colocalization  
656 of gwas and eqtl signals detects target genes. *Am J Hum Genet*, 99(6):1245–  
657 1260.

658 International Consortium for Blood Pressure Genome-Wide Association, S., Ehret,  
659 G. B., Munroe, P. B., Rice, K. M., Bochud, M., Johnson, A. D., Chasman,  
660 D. I., Smith, A. V., Tobin, M. D., Verwoert, G. C., Hwang, S. J., Pihur, V.,  
661 Vollenweider, P., O'Reilly, P. F., Amin, N., Bragg-Gresham, J. L., Teumer,  
662 A., Glazer, N. L., Launer, L., Zhao, J. H., Aulchenko, Y., Heath, S., Sober,  
663 S., Parsa, A., Luan, J., Arora, P., Dehghan, A., Zhang, F., Lucas, G., Hicks,  
664 A. A., Jackson, A. U., Peden, J. F., Tanaka, T., Wild, S. H., Rudan, I., Igl, W.,  
665 Milaneschi, Y., Parker, A. N., Fava, C., Chambers, J. C., Fox, E. R., Kumari, M.,  
666 Go, M. J., van der Harst, P., Kao, W. H., Sjogren, M., Vinay, D. G., Alexander,



667 M., Tabara, Y., Shaw-Hawkins, S., Whincup, P. H., Liu, Y., Shi, G., Kuusisto,  
668 J., Tayo, B., Seielstad, M., Sim, X., Nguyen, K. D., Lehtimaki, T., Matullo, G.,  
669 Wu, Y., Gaunt, T. R., Onland-Moret, N. C., Cooper, M. N., Platou, C. G., Org,  
670 E., Hardy, R., Dahgam, S., Palmen, J., Vitart, V., Braund, P. S., Kuznetsova,  
671 T., Uiterwaal, C. S., Adeyemo, A., Palmas, W., Campbell, H., Ludwig, B.,  
672 Tomaszewski, M., Tzoulaki, I., Palmer, N. D., consortium, C. A., Consortium,  
673 C. K., KidneyGen, C., EchoGen, c., consortium, C.-H., Aspelund, T., Garcia,  
674 M., Chang, Y. P., O'Connell, J. R., Steinle, N. I., Grobbee, D. E., Arking,  
675 D.E., Kardia, S. L., Morrison, A. C., Hernandez, D., Najjar, S., McArdle,  
676 W. L., Hadley, D., Brown, M. J., Connell, J. M., et al. (2011). Genetic variants in  
677 novel pathways influence blood pressure and cardiovascular disease risk. *Nature*,  
678 478(7367):103–9.

679 International HapMap, C. (2003). The international hapmap project. *Nature*,  
680 426(6968):789–96.

681 Jiang, C. and Zeng, Z. B. (1995). Multiple trait analysis of genetic mapping for  
682 quantitative trait loci. *Genetics*, 140(3):1111–27.

683 Kottgen, A., Pattaro, C., Boger, C. A., Fuchsberger, C., Olden, M., Glazer, N. L.,  
684 Parsa, A., Gao, X., Yang, Q., Smith, A. V., O'Connell, J. R., Li, M., Schmidt,  
685 H., Tanaka, T., Isaacs, A., Ketkar, S., Hwang, S. J., Johnson, A. D., Dehghan,  
686 A., Teumer, A., Pare, G., Atkinson, E. J., Zeller, T., Lohman, K., Cornelis,

687 M. C., Probst-Hensch, N. M., Kronenberg, F., Tonjes, A., Hayward, C., As-  
688 pelund, T., Eiriksdottir, G., Launer, L. J., Harris, T. B., Rampersaud, E.,  
689 Mitchell, B. D., Arking, D. E., Boerwinkle, E., Struchalin, M., Cavalieri, M.,  
690 Singleton, A., Giallauria, F., Metter, J., de Boer, I. H., Haritunians, T., Lum-  
691 ley, T., Siscovick, D., Psaty, B. M., Zillikens, M. C., Oostra, B. A., Feitosa, M.,  
692 Province, M., de Andrade, M., Turner, S. T., Schillert, A., Ziegler, A., Wild,  
693 P. S., Schnabel, R. B., Wilde, S., Munzel, T. F., Leak, T. S., Illig, T., Klopp,  
694 N., Meisinger, C., Wichmann, H. E., Koenig, W., Zgaga, L., Zemunik, T., Kol-  
695 cic, I., Minelli, C., Hu, F. B., Johansson, A., Igl, W., Zaboli, G., Wild, S. H.,  
696 Wright, A. F., Campbell, H., Ellinghaus, D., Schreiber, S., Aulchenko, Y. S.,  
697 Felix, J. F., Rivadeneira, F., Uitterlinden, A. G., Hofman, A., Imboden, M.,  
698 Nitsch, D., Brandstatter, A., Kollerits, B., Kedenko, L., Magi, R., Stumvoll, M.,  
699 Kovacs, P., Boban, M., Campbell, S., Endlich, K., Volzke, H., Kroemer, H. K.,  
700 Nauck, M., Volker, U., Polasek, O., Vitart, V., et al. (2010). New loci associated  
701 with kidney function and chronic kidney disease. *Nat Genet*, 42(5):376–84.

702 Lango Allen, H., Estrada, K., Lettre, G., Berndt, S. I., Weedon, M. N., Ri-  
703 vadeneira, F., Willer, C. J., Jackson, A. U., Vedantam, S., Raychaudhuri, S.,  
704 Ferreira, T., Wood, A. R., Weyant, R. J., Segre, A. V., Speliotes, E. K., Wheeler,  
705 E., Soranzo, N., Park, J. H., Yang, J., Gudbjartsson, D., Heard-Costa, N. L.,  
706 Randall, J. C., Qi, L., Vernon Smith, A., Magi, R., Pastinen, T., Liang, L.,

707 Heid, I. M., Luan, J., Thorleifsson, G., Winkler, T. W., Goddard, M. E., Sin Lo,  
708 K., Palmer, C., Workalemahu, T., Aulchenko, Y. S., Johansson, A., Zillikens,  
709 M. C., Feitosa, M. F., Esko, T., Johnson, T., Ketkar, S., Kraft, P., Mangino,  
710 M., Prokopenko, I., Absher, D., Albrecht, E., Ernst, F., Glazer, N. L., Hayward,  
711 C., Hottenga, J. J., Jacobs, K. B., Knowles, J. W., Kutalik, Z., Monda, K. L.,  
712 Polasek, O., Preuss, M., Rayner, N. W., Robertson, N. R., Steinthorsdottir, V.,  
713 Tyrer, J. P., Voight, B. F., Wiklund, F., Xu, J., Zhao, J. H., Nyholt, D. R.,  
714 Pellikka, N., Perola, M., Perry, J. R., Surakka, I., Tammesoo, M. L., Altmaier,  
715 E. L., Amin, N., Aspelund, T., Bhangale, T., Boucher, G., Chasman, D. I.,  
716 Chen, C., Coin, L., Cooper, M. N., Dixon, A. L., Gibson, Q., Grundberg, E.,  
717 Hao, K., Juhani Juntila, M., Kaplan, L. M., Kettunen, J., Konig, I. R., Kwan,  
718 T., Lawrence, R. W., Levinson, D. F., Lorentzon, M., McKnight, B., Morris,  
719 A. P., Muller, M., Suh Ngwa, J., Purcell, S., Rafelt, S., Salem, R. M., Salvi,  
720 E., et al. (2010). Hundreds of variants clustered in genomic loci and biological  
721 pathways affect human height. *Nature*, 467(7317):832–8.

722 Lewin, A., Saadi, H., Peters, J. E., Moreno-Moral, A., Lee, J. C., Smith, K. G., Pe-  
723 tretto, E., Bottolo, L., and Richardson, S. (2016). Mt-hess: an efficient bayesian  
724 approach for simultaneous association detection in omics datasets, with appli-  
725 cation to eqtl mapping in multiple tissues. *Bioinformatics*, 32(4):523–32.

726 Li, Y. and Kellis, M. (2016). Joint bayesian inference of risk variants and tissue-

727 specific epigenomic enrichments across multiple complex human diseases. *Nu-*  
728 *cleic Acids Res*, 44(18):e144.

729 Li, Y. I., van de Geijn, B., Raj, A., Knowles, D. A., Petti, A. A., Golan, D., Gilad,  
730 Y., and Pritchard, J. K. (2016). Rna splicing is a primary link between genetic  
731 variation and disease. *Science*, 352(6285):600–4.

732 Locke, A. E., Kahali, B., Berndt, S. I., Justice, A. E., Pers, T. H., Day, F. R.,  
733 Powell, C., Vedantam, S., Buchkovich, M. L., Yang, J., Croteau-Chonka, D. C.,  
734 Esko, T., Fall, T., Ferreira, T., Gustafsson, S., Kutalik, Z., Luan, J., Magi, R.,  
735 Randall, J. C., Winkler, T. W., Wood, A. R., Workalemahu, T., Faul, J. D.,  
736 Smith, J. A., Zhao, J. H., Zhao, W., Chen, J., Fehrmann, R., Hedman, A. K.,  
737 Karjalainen, J., Schmidt, E. M., Absher, D., Amin, N., Anderson, D., Beekman,  
738 M., Bolton, J. L., Bragg-Gresham, J. L., Buyske, S., Demirkan, A., Deng, G.,  
739 Ehret, G. B., Feenstra, B., Feitosa, M. F., Fischer, K., Goel, A., Gong, J.,  
740 Jackson, A. U., Kanoni, S., Kleber, M. E., Kristiansson, K., Lim, U., Lotay, V.,  
741 Mangino, M., Leach, I. M., Medina-Gomez, C., Medland, S. E., Nalls, M. A.,  
742 Palmer, C. D., Pasko, D., Pechlivanis, S., Peters, M. J., Prokopenko, I., Shungin,  
743 D., Stancakova, A., Strawbridge, R. J., Sung, Y. J., Tanaka, T., Teumer, A.,  
744 Trompet, S., van der Laan, S. W., van Setten, J., Van Vliet-Ostaptchouk, J. V.,  
745 Wang, Z., Yengo, L., Zhang, W., Isaacs, A., Albrecht, E., Arnlov, J., Arscott,  
746 G. M., Attwood, A. P., Bandinelli, S., Barrett, A., Bas, I. N., Bellis, C., Bennett,

747 A. J., Berne, C., Blagieva, R., Bluher, M., Bohringer, S., Bonnycastle, L. L.,  
748 Bottcher, Y., Boyd, H. A., Bruinenberg, M., Caspersen, I. H., Chen, Y. I.,  
749 Clarke, R., Daw, E. W., de Craen, A. J. M., Delgado, G., Dimitriou, M., et al.  
750 (2015). Genetic studies of body mass index yield new insights for obesity biology.  
751 *Nature*, 518(7538):197–206.

752 MacArthur, J., Bowler, E., Cerezo, M., Gil, L., Hall, P., Hastings, E., Junkins, H.,  
753 McMahon, A., Milano, A., Morales, J., Pendlington, Z. M., Welter, D., Burdett,  
754 T., Hindorff, L., Flicek, P., Cunningham, F., and Parkinson, H. (2017). The new  
755 nhgri-ebi catalog of published genome-wide association studies (gwas catalog).  
756 *Nucleic Acids Res*, 45(D1):D896–D901.

757 Pai, A. A., Pritchard, J. K., and Gilad, Y. (2015). The genetic and mechanistic  
758 basis for variation in gene regulation. *PLoS Genet*, 11(1):e1004857.

759 Pickrell, J. K., Berisa, T., Liu, J. Z., Segurel, L., Tung, J. Y., and Hinds, D. A.  
760 (2016). Detection and interpretation of shared genetic influences on 42 human  
761 traits. *Nat Genet*, 48(7):709–17.

762 Porter, H. F. and O'Reilly, P. F. (2017). Multivariate simulation framework reveals  
763 performance of multi-trait gwas methods. *Sci Rep*, 7:38837.

764 Price, A. L., Spencer, C. C., and Donnelly, P. (2015). Progress and promise

765 in understanding the genetic basis of common diseases. *Proc Biol Sci*,  
766 282(1821):20151684.

767 Sherry, S. T., Ward, M. H., Kholodov, M., Baker, J., Phan, L., Smigielski, E. M.,  
768 and Sirotkin, K. (2001). dbSNP: the NCBI database of genetic variation. *Nucleic  
769 Acids Res*, 29(1):308–11.

770 Shi, H., Mancuso, N., Spendlove, S., and Pasaniuc, B. (2017). Local genetic  
771 correlation gives insights into the shared genetic architecture of complex traits.  
772 *Am J Hum Genet*, 101(5):737–751.

773 Shriner, D. (2012). Moving toward system genetics through multiple trait analysis  
774 in genome-wide association studies. *Front Genet*, 3:1.

775 Shungin, D., Winkler, T. W., Croteau-Chonka, D. C., Ferreira, T., Locke,  
776 A. E., Magi, R., Strawbridge, R. J., Pers, T. H., Fischer, K., Justice, A. E.,  
777 Workalemahu, T., Wu, J. M. W., Buchkovich, M. L., Heard-Costa, N. L., Ro-  
778 man, T. S., Drong, A. W., Song, C., Gustafsson, S., Day, F. R., Esko, T., Fall,  
779 T., Kutalik, Z., Luan, J., Randall, J. C., Scherag, A., Vedantam, S., Wood,  
780 A. R., Chen, J., Fehrmann, R., Karjalainen, J., Kahali, B., Liu, C. T., Schmidt,  
781 E. M., Absher, D., Amin, N., Anderson, D., Beekman, M., Bragg-Gresham,  
782 J. L., Buyske, S., Demirkan, A., Ehret, G. B., Feitosa, M. F., Goel, A., Jack-  
783 son, A. U., Johnson, T., Kleber, M. E., Kristiansson, K., Mangino, M., Leach,

784 I. M., Medina-Gomez, C., Palmer, C. D., Pasko, D., Pechlivanis, S., Peters,  
785 M. J., Prokopenko, I., Stancakova, A., Sung, Y. J., Tanaka, T., Teumer, A.,  
786 Van Vliet-Ostaptchouk, J. V., Yengo, L., Zhang, W., Albrecht, E., Arnlov, J.,  
787 Arscott, G. M., Bandinelli, S., Barrett, A., Bellis, C., Bennett, A. J., Berne, C.,  
788 Bluher, M., Bohringer, S., Bonnet, F., Bottcher, Y., Bruinenberg, M., Carba,  
789 D. B., Caspersen, I. H., Clarke, R., Daw, E. W., Deelen, J., Deelman, E.,  
790 Delgado, G., Doney, A. S., Eklund, N., Erdos, M. R., Estrada, K., Eury, E.,  
791 Friedrich, N., Garcia, M. E., Giedraitis, V., Gigante, B., Go, A. S., Golay, A.,  
792 Grallert, H., Grammer, T. B., Grassler, J., Grewal, J., Groves, C. J., Haller, T.,  
793 Hallmans, G., et al. (2015). New genetic loci link adipose and insulin biology to  
794 body fat distribution. *Nature*, 518(7538):187–196.

795 Speliotes, E. K., Willer, C. J., Berndt, S. I., Monda, K. L., Thorleifsson, G.,  
796 Jackson, A. U., Allen, H. L., Lindgren, C. M., Luan, J., Magi, R., Randall,  
797 J. C., Vedantam, S., Winkler, T. W., Qi, L., Workalemahu, T., Heid, I. M.,  
798 Steinthorsdottir, V., Stringham, H. M., Weedon, M. N., Wheeler, E., Wood,  
799 A. R., Ferreira, T., Weyant, R. J., Segre, A. V., Estrada, K., Liang, L., Nemesh,  
800 J., Park, J. H., Gustafsson, S., Kilpelainen, T. O., Yang, J., Bouatia-Naji, N.,  
801 Esko, T., Feitosa, M. F., Kutalik, Z., Mangino, M., Raychaudhuri, S., Scherag,  
802 A., Smith, A. V., Welch, R., Zhao, J. H., Aben, K. K., Absher, D. M., Amin,  
803 N., Dixon, A. L., Fisher, E., Glazer, N. L., Goddard, M. E., Heard-Costa, N. L.,

804 Hoesel, V., Hottenga, J. J., Johansson, A., Johnson, T., Ketkar, S., Lamina,  
805 C., Li, S., Moffatt, M. F., Myers, R. H., Narisu, N., Perry, J. R., Peters, M. J.,  
806 Preuss, M., Ripatti, S., Rivadeneira, F., Sandholt, C., Scott, L. J., Timpson,  
807 N. J., Tyrer, J. P., van Wingerden, S., Watanabe, R. M., White, C. C., Wiklund,  
808 F., Barlassina, C., Chasman, D. I., Cooper, M. N., Jansson, J. O., Lawrence,  
809 R. W., Pellikka, N., Prokopenko, I., Shi, J., Thiering, E., Alavere, H., Alibrandi,  
810 M. T., Almgren, P., Arnold, A. M., Aspelund, T., Atwood, L. D., Balkau, B.,  
811 Balmforth, A. J., Bennett, A. J., Ben-Shlomo, Y., Bergman, R. N., Bergmann,  
812 S., Biebermann, H., Blakemore, A. I., Boes, T., Bonnycastle, L. L., Bornstein,  
813 S. R., Brown, M. J., Buchanan, T. A., et al. (2010). Association analyses of  
814 249,796 individuals reveal 18 new loci associated with body mass index. *Nat*  
815 *Genet*, 42(11):937–48.

816 Stephens, M. (2013). A unified framework for association analysis with multiple  
817 related phenotypes. *PLoS One*, 8(7):e65245.

818 Stricker, S. H., Koflerle, A., and Beck, S. (2017). From profiles to function in  
819 epigenomics. *Nat Rev Genet*, 18(1):51–66.

820 Sudlow, C., Gallacher, J., Allen, N., Beral, V., Burton, P., Danesh, J., Downey,  
821 P., Elliott, P., Green, J., Landray, M., Liu, B., Matthews, P., Ong, G., Pell, J.,  
822 Silman, A., Young, A., Sprosen, T., Peakman, T., and Collins, R. (2015). Uk



823 biobank: an open access resource for identifying the causes of a wide range of  
824 complex diseases of middle and old age. *PLoS Med*, 12(3):e1001779.

825 Teslovich, T. M., Musunuru, K., Smith, A. V., Edmondson, A. C., Stylianou,  
826 I. M., Koseki, M., Pirruccello, J. P., Ripatti, S., Chasman, D. I., Willer, C. J.,  
827 Johansen, C. T., Fouchier, S. W., Isaacs, A., Peloso, G. M., Barbalic, M., Rick-  
828 etts, S. L., Bis, J. C., Aulchenko, Y. S., Thorleifsson, G., Feitosa, M. F., Cham-  
829 bers, J., Orho-Melander, M., Melander, O., Johnson, T., Li, X., Guo, X., Li, M.,  
830 Shin Cho, Y., Jin Go, M., Jin Kim, Y., Lee, J. Y., Park, T., Kim, K., Sim, X.,  
831 Twee-Hee Ong, R., Croteau-Chonka, D. C., Lange, L. A., Smith, J. D., Song,  
832 K., Hua Zhao, J., Yuan, X., Luan, J., Lamina, C., Ziegler, A., Zhang, W., Zee,  
833 R. Y., Wright, A. F., Witteman, J. C., Wilson, J. F., Willemsen, G., Wichmann,  
834 H. E., Whitfield, J. B., Waterworth, D. M., Wareham, N. J., Waeber, G., Vollen-  
835 weider, P., Voight, B. F., Vitart, V., Uitterlinden, A. G., Uda, M., Tuomilehto,  
836 J., Thompson, J. R., Tanaka, T., Surakka, I., Stringham, H. M., Spector, T. D.,  
837 Soranzo, N., Smit, J. H., Sinisalo, J., Silander, K., Sijbrands, E. J., Scuteri, A.,  
838 Scott, J., Schlessinger, D., Sanna, S., Salomaa, V., Saharinen, J., Sabatti, C.,  
839 Ruokonen, A., Rudan, I., Rose, L. M., Roberts, R., Rieder, M., Psaty, B. M.,  
840 Pramstaller, P. P., Pichler, I., Perola, M., Penninx, B. W., Pedersen, N. L.,  
841 Pattaro, C., Parker, A. N., Pare, G., Oostra, B. A., O'Donnell, C. J., Nieminen,  
842 M. S., Nickerson, D. A., Montgomery, G. W., Meitinger, T., McPherson, R.,

843 McCarthy, M. I., et al. (2010). Biological, clinical and population relevance of  
844 95 loci for blood lipids. *Nature*, 466(7307):707–13.

845 Urbut, S. M., Wang, G., and Stephens, M. (2017). Flexible statistical methods  
846 for estimating and testing effects in genomic studies with multiple conditions.  
847 *bioRxiv*, 096552.

848 van der Harst, P., Zhang, W., Mateo Leach, I., Rendon, A., Verweij, N., Sehmi, J.,  
849 Paul, D. S., Elling, U., Allayee, H., Li, X., Radhakrishnan, A., Tan, S. T., Voss,  
850 K., Weichenberger, C. X., Albers, C. A., Al-Hussani, A., Asselbergs, F. W.,  
851 Ciullo, M., Danjou, F., Dina, C., Esko, T., Evans, D. M., Franke, L., Gogele,  
852 M., Hartiala, J., Hersch, M., Holm, H., Hottenga, J. J., Kanoni, S., Kleber,  
853 M. E., Lagou, V., Langenberg, C., Lopez, L. M., Lyytikainen, L. P., Melander,  
854 O., Murgia, F., Nolte, I. M., O'Reilly, P. F., Padmanabhan, S., Parsa, A.,  
855 Pirastu, N., Porcu, E., Portas, L., Prokopenko, I., Ried, J. S., Shin, S. Y., Tang,  
856 C. S., Teumer, A., Traglia, M., Ulivi, S., Westra, H. J., Yang, J., Zhao, J. H.,  
857 Anni, F., Abdellaoui, A., Attwood, A., Balkau, B., Bandinelli, S., Bastardot,  
858 F., Benyamin, B., Boehm, B. O., Cookson, W. O., Das, D., de Bakker, P. I.,  
859 de Boer, R. A., de Geus, E. J., de Moor, M. H., Dimitriou, M., Domingues, F. S.,  
860 Doring, A., Engstrom, G., Eyjolfsson, G. I., Ferrucci, L., Fischer, K., Galanella,  
861 R., Garner, S. F., Genser, B., Gibson, Q. D., Girotto, G., Gudbjartsson, D. F.,  
862 Harris, S. E., Hartikainen, A. L., Hastie, C. E., Hedblad, B., Illig, T., Jolley, J.,

863 Kahonen, M., Kema, I. P., Kemp, J. P., Liang, L., Lloyd-Jones, H., Loos, R. J.,  
864 Meacham, S., Medland, S. E., Meisinger, C., Memari, Y., Mihailov, E., Miller,  
865 K., Moffatt, M. F., Nauck, M., et al. (2012). Seventy-five genetic loci influencing  
866 the human red blood cell. *Nature*, 492(7429):369–75.

867 Visscher, P. M., Wray, N. R., Zhang, Q., Sklar, P., McCarthy, M. I., Brown,  
868 M. A., and Yang, J. (2017). 10 years of gwas discovery: Biology, function, and  
869 translation. *Am J Hum Genet*, 101(1):5–22.

870 Wain, L. V., Verwoert, G. C., O'Reilly, P. F., Shi, G., Johnson, T., Johnson, A. D.,  
871 Bochud, M., Rice, K. M., Henneman, P., Smith, A. V., Ehret, G. B., Amin, N.,  
872 Larson, M. G., Mooser, V., Hadley, D., Dorr, M., Bis, J. C., Aspelund, T.,  
873 Esko, T., Janssens, A. C., Zhao, J. H., Heath, S., Laan, M., Fu, J., Pistis, G.,  
874 Luan, J., Arora, P., Lucas, G., Pirastu, N., Pichler, I., Jackson, A. U., Webster,  
875 R. J., Zhang, F., Peden, J. F., Schmidt, H., Tanaka, T., Campbell, H., Igl,  
876 W., Milaneschi, Y., Hottenga, J. J., Vitart, V., Chasman, D. I., Trompet, S.,  
877 Bragg-Gresham, J. L., Alizadeh, B. Z., Chambers, J. C., Guo, X., Lehtimäki,  
878 T., Kuhnel, B., Lopez, L. M., Polasek, O., Boban, M., Nelson, C. P., Morrison,  
879 A. C., Pihur, V., Ganesh, S. K., Hofman, A., Kundu, S., Mattace-Raso, F. U.,  
880 Rivadeneira, F., Sijbrands, E. J., Uitterlinden, A. G., Hwang, S. J., Vasan, R. S.,  
881 Wang, T. J., Bergmann, S., Vollenweider, P., Waeber, G., Laitinen, J., Pouta,  
882 A., Zitting, P., McArdle, W. L., Kroemer, H. K., Volker, U., Volzke, H., Glazer,

883 N. L., Taylor, K. D., Harris, T. B., Alavere, H., Haller, T., Keis, A., Tammesoo,  
884 M. L., Aulchenko, Y., Barroso, I., Khaw, K. T., Galan, P., Hercberg, S., Lathrop,  
885 M., Eyheramendy, S., Org, E., Sober, S., Lu, X., Nolte, I. M., Penninx, B. W.,  
886 Corre, T., Masciullo, C., Sala, C., Groop, L., Voight, B. F., Melander, O., et al.  
887 (2011). Genome-wide association study identifies six new loci influencing pulse  
888 pressure and mean arterial pressure. *Nat Genet*, 43(10):1005–11.

889 Wen, X., Pique-Regi, R., and Luca, F. (2017). Integrating molecular qtl data  
890 into genome-wide genetic association analysis: Probabilistic assessment of en-  
891 richment and colocalization. *PLoS Genet*, 13(3):e1006646.

892 Willer, C. J., Schmidt, E. M., Sengupta, S., Peloso, G. M., Gustafsson, S., Kanoni,  
893 S., Ganna, A., Chen, J., Buchkovich, M. L., Mora, S., Beckmann, J. S., Bragg-  
894 Gresham, J. L., Chang, H. Y., Demirkan, A., Den Hertog, H. M., Do, R.,  
895 Donnelly, L. A., Ehret, G. B., Esko, T., Feitosa, M. F., Ferreira, T., Fischer,  
896 K., Fontanillas, P., Fraser, R. M., Freitag, D. F., Gurdasani, D., Heikkila, K.,  
897 Hypponen, E., Isaacs, A., Jackson, A. U., Johansson, A., Johnson, T., Kaakinen,  
898 M., Kettunen, J., Kleber, M. E., Li, X., Luan, J., Lytikainen, L. P., Magnusson,  
899 P. K. E., Mangino, M., Mihailov, E., Montasser, M. E., Muller-Nurasyid, M.,  
900 Nolte, I. M., O'Connell, J. R., Palmer, C. D., Perola, M., Petersen, A. K.,  
901 Sanna, S., Saxena, R., Service, S. K., Shah, S., Shungin, D., Sidore, C., Song,  
902 C., Strawbridge, R. J., Surakka, I., Tanaka, T., Teslovich, T. M., Thorleifsson,

903 G., Van den Herik, E. G., Voight, B. F., Volcik, K. A., Waite, L. L., Wong,  
904 A., Wu, Y., Zhang, W., Absher, D., Asiki, G., Barroso, I., Been, L. F., Bolton,  
905 J. L., Bonnycastle, L. L., Brambilla, P., Burnett, M. S., Cesana, G., Dimitriou,  
906 M., Doney, A. S. F., Doring, A., Elliott, P., Epstein, S. E., Ingi Eyjolfsson,  
907 G., Gigante, B., Goodarzi, M. O., Grallert, H., Gravito, M. L., Groves, C. J.,  
908 Hallmans, G., Hartikainen, A. L., Hayward, C., Hernandez, D., Hicks, A. A.,  
909 Holm, H., Hung, Y. J., Illig, T., Jones, M. R., Kaleebu, P., Kastelein, J. J. P.,  
910 Khaw, K. T., Kim, E., et al. (2013). Discovery and refinement of loci associated  
911 with lipid levels. *Nat Genet*, 45(11):1274–1283.

912 Wood, A. R., Esko, T., Yang, J., Vedantam, S., Pers, T. H., Gustafsson, S.,  
913 Chu, A. Y., Estrada, K., Luan, J., Kutalik, Z., Amin, N., Buchkovich, M. L.,  
914 Croteau-Chonka, D. C., Day, F. R., Duan, Y., Fall, T., Fehrmann, R., Ferreira,  
915 T., Jackson, A. U., Karjalainen, J., Lo, K. S., Locke, A. E., Magi, R., Mi-  
916 hailov, E., Porcu, E., Randall, J. C., Scherag, A., Vinkhuyzen, A. A., Westra,  
917 H. J., Winkler, T. W., Workalemahu, T., Zhao, J. H., Absher, D., Albrecht,  
918 E., Anderson, D., Baron, J., Beekman, M., Demirkan, A., Ehret, G. B., Feen-  
919 stra, B., Feitosa, M. F., Fischer, K., Fraser, R. M., Goel, A., Gong, J., Justice,  
920 A. E., Kanoni, S., Kleber, M. E., Kristiansson, K., Lim, U., Lotay, V., Lui,  
921 J. C., Mangino, M., Mateo Leach, I., Medina-Gomez, C., Nalls, M. A., Nyholt,  
922 D. R., Palmer, C. D., Pasko, D., Pechlivanis, S., Prokopenko, I., Ried, J. S.,

923 Ripke, S., Shungin, D., Stancakova, A., Strawbridge, R. J., Sung, Y. J., Tanaka,  
924 T., Teumer, A., Trompet, S., van der Laan, S. W., van Setten, J., Van Vliet-  
925 Ostaptchouk, J. V., Wang, Z., Yengo, L., Zhang, W., Afzal, U., Arnlov, J.,  
926 Arscott, G. M., Bandinelli, S., Barrett, A., Bellis, C., Bennett, A. J., Berne, C.,  
927 Bluher, M., Bolton, J. L., Bottcher, Y., Boyd, H. A., Bruinenberg, M., Buckley,  
928 B. M., Buyske, S., Caspersen, I. H., Chines, P. S., Clarke, R., Claudi-Boehm, S.,  
929 Cooper, M., Daw, E. W., De Jong, P. A., Deelen, J., Delgado, G., et al. (2014).  
930 Defining the role of common variation in the genomic and biological architecture  
931 of adult human height. *Nat Genet*, 46(11):1173–86.

932 Yang, Q. and Wang, Y. (2012). Methods for analyzing multivariate phenotypes in  
933 genetic association studies. *J Probab Stat*, 2012:652569.

934 Zheng, H. F., Forgetta, V., Hsu, Y. H., Estrada, K., Rosello-Diez, A., Leo, P. J.,  
935 Dahia, C. L., Park-Min, K. H., Tobias, J. H., Kooperberg, C., Kleinman, A.,  
936 Stykarsdottir, U., Liu, C. T., Uggl, C., Evans, D. S., Nielson, C. M., Walter,  
937 K., Pettersson-Kymmer, U., McCarthy, S., Eriksson, J., Kwan, T., Jhamai,  
938 M., Trajanoska, K., Memari, Y., Min, J., Huang, J., Danecek, P., Wilmot, B.,  
939 Li, R., Chou, W. C., Mokry, L. E., Moayyeri, A., Claussnitzer, M., Cheng,  
940 C. H., Cheung, W., Medina-Gomez, C., Ge, B., Chen, S. H., Choi, K., Oei,  
941 L., Fraser, J., Kraaij, R., Hibbs, M. A., Gregson, C. L., Paquette, D., Hofman,  
942 A., Wibom, C., Tranah, G. J., Marshall, M., Gardiner, B. B., Cremin, K.,

943 Auer, P., Hsu, L., Ring, S., Tung, J. Y., Thorleifsson, G., Enneman, A. W.,  
944 van Schoor, N. M., de Groot, L. C., van der Velde, N., Melin, B., Kemp, J. P.,  
945 Christiansen, C., Sayers, A., Zhou, Y., Calderari, S., van Rooij, J., Carlson, C.,  
946 Peters, U., Berlivet, S., Dostie, J., Uitterlinden, A. G., Williams, S. R., Farber,  
947 C., Grinberg, D., LaCroix, A. Z., Haessler, J., Chasman, D. I., Giulianini, F.,  
948 Rose, L. M., Ridker, P. M., Eisman, J. A., Nguyen, T. V., Center, J. R., Nogues,  
949 X., Garcia-Giralt, N., Launer, L. L., Gudnason, V., Mellstrom, D., Vandenput,  
950 L., Amin, N., van Duijn, C. M., Karlsson, M. K., Ljunggren, O., Svensson, O.,  
951 Hallmans, G., Rousseau, F., Giroux, S., Bussiere, J., Arp, P. P., et al. (2015).  
952 Whole-genome sequencing identifies *en1* as a determinant of bone density and  
953 fracture. *Nature*, 526(7571):112–7.

954 Zhu, W. and Zhang, H. (2009). Why do we test multiple traits in genetic associa-  
955 tion studies? *J Korean Stat Soc*, 38(1):1–10.

956 Zhu, Z., Zhang, F., Hu, H., Bakshi, A., Robinson, M. R., Powell, J. E., Mont-  
957 gomery, G. W., Goddard, M. E., Wray, N. R., Visscher, P. M., and Yang, J.  
958 (2016). Integration of summary data from gwas and eqtl studies predicts com-  
959 plex trait gene targets. *Nat Genet*, 48(5):481–7.

## 960 9 Figure Legends

961 **Figure 1: Number of Independent Significant SNPs, By Study.** The barplot  
962 shows the number of independent SNPs that were significant in previous univariate  
963 analyses (blue) and the number of additional significant associations in our new  
964 multivariate analyses (red). For univariate analysis, significance levels were set by  
965 the original study. For multivariate analyses, we declared a SNP to be significant  
966 if its weighted average Bayes Factor ( $BF_{av}$ ) exceeded that of the smallest  $BF_{av}$   
967 among the previous univariate significant SNPs. We considered SNPs more than  
968 .5Mb apart to be independent. See Table 1 and Online Methods for phenotype  
969 details, Online Methods for further analysis details, and Supplementary Tables 2-4  
970 for lists of significant SNPs from each dataset.

971 **Figure 2: Replication of New Multivariate Associations.** The figure  
972 shows results based on earlier and later releases from studies with multiple re-  
973 leases (GlobalLipids, GIANT, and HaemgenRBC). Each point represents a new  
974 multivariate association identified in our multivariate analysis of the earlier release.  
975 The  $x$ - and  $y$ -axes show the minimum (across phenotypes) of the  $-\log_{10}$  univariate  
976  $p$ -values from the earlier release ( $x$ -axis) vs. the later release ( $y$ -axis). Dashed red  
977 lines represent the univariate significance GWAS thresholds used for each study's  
978 releases. Across all three studies, 84 out of 94 new multivariate associations from  
979 the earlier releases have smaller minimum univariate  $p$ -values in the later release,



980 and 68 out of 84 new multivariate associations that did not reach GWAS signifi-  
981 cance in the earlier release do so in the later release (see Supplementary Table 5  
982 for a per-dataset breakdown).

983 **Figure 3: Comparison of New Multivariate Hits vs. Relaxing Univariate**  
984 **ate  $p$ -Value Threshold.** For each data set the graph shows how many associ-  
985 ations become significant as the univariate  $p$ -value threshold is relaxed (moving  
986 from right to left on the  $x$ -axis), and how many of these are declared as new mul-  
987 tivariate hits in our analysis. In both cases results are pruned to avoid counting  
988 associations of SNPs in strong LD; see Online Methods for details. The appearance  
989 of appreciable blue areas indicates that the multivariate analysis is reordering the  
990 significance of SNPs compared with performing multiple univariate analyses.

991 **Figure 4: Distribution, Across Significant SNPs, of Number of Phe-**  
992 **notypes That Are Confidently Associated (A) or Confidently Unassoci-**  
993 **ated (B).** Results are shown for three well-powered datasets: GlobalLipids2013,  
994 GIANT2014/5, and HaemgenRBC2016. Here “confident” means with probability  
995  $> 0.95$ , so a SNP is considered “confidently associated” with a phenotype if the  
996 sum of its probabilities in the “Directly Associated” and “Indirectly Associated”  
997 categories exceeds 0.95 (A), and is considered confidently unassociated with the  
998 phenotype if this probability is less than 0.05 (B). The set of significant SNPs

999 includes both previous univariate associations and new multivariate associations.

## 1000 10 Supporting Information Legends

1001 Supplementary Figure 1: **Graphical Model of Multivariate Categories**. Shown  
1002 here is a Directed Acyclic Graphical (DAG) model of our multivariate categories  
1003 in the context of our vector of phenotypes  $\mathbf{Y}$  (e.g.  $\mathbf{Y} = \{\mathbf{Y}_U, \mathbf{Y}_D, \mathbf{Y}_I\}$ ) and their  
1004 connections with the variant of interest  $\mathbf{g}$ . The relationships described in-text  
1005 can be seen here.  $\mathbf{Y}_U$ , our unassociated phenotypes, have no connection with  $\mathbf{g}$ .  
1006  $\mathbf{Y}_D$ , our directly associated phenotypes, have a direct connection with  $\mathbf{g}$ . And  
1007  $\mathbf{Y}_I$ , our indirectly associated phenotypes, have a connection with  $\mathbf{g}$  only by going  
1008 through  $\mathbf{Y}_D$  first. Note that if  $\mathbf{Y}_D$  were not observed,  $\mathbf{Y}_I$  would appear as a direct  
1009 connection.

1010 Supplementary Figure 2: **Refining Association Signals – GlobalLipids2013**  
1011 **rs7515577 & rs12038699**. Shown are the  $-\log_{10}$  univariate  $p$ -values from the  
1012 GlobalLipids2013 analysis for both the previous univariate association rs7515577  
1013 (“Previous Univariate SNP”) and the new multivariate association rs12038699  
1014 (“New Multivariate SNP”) across all four phenotypes analyzed. rs7515577 is repre-  
1015 sented as a triangle and rs12038699 is represented as a square. Also shown are the  
1016  $-\log_{10}$  univariate  $p$ -values of SNPs within 1Mb of the midpoint between rs7515577

1017 and rs12038699. Color-coding of the SNPs represent the degree of linkage disequi-  
1018 librium between variants and the new association rs12038699 based on the GBR  
1019 cohort of 1000Genomes ([Genomes Project et al., 2015](#)); for color coding details,  
1020 see legend.

1021 **Supplementary Figure 3: Effect Size Heterogeneity Among SNPs With**  
1022 **Identical Multivariate Model Assignments.** Shown are the phenotype effect  
1023 sizes (points), and  $\pm 2$  standard errors (bars), for four significantly associated SNPs  
1024 from HaemgenRBC2016. All four SNPs were classified as being “associated” with  
1025 all six phenotypes (i.e. marginal posterior probability of association  $\geq 95\%$  for  
1026 each phenotype). However, they clearly show different patterns of effect sizes.  
1027 Therefore focusing simply on binary calls of “associated” vs “unassociated” can  
1028 hide different patterns of multivariate association.

1029 **Supplementary Table 1: Summary of Associations in Each Dataset.**

1030 <sup>a</sup> Number of new multivariate associations discovered by our analysis. Note that  
1031 we required a multivariate association to be at least 500kb from a previous re-  
1032 ported association to be considered “new”.

1033 <sup>b</sup> Univariate GWAS significance  $p$ -value threshold used by the original study pub-  
1034 lication.

1035 <sup>c</sup> These are new multivariate SNPs that were not reported by the original study

1036 despite having a univariate association (in the public summary data) that was  
1037 genome-wide significant by the original study's univariate significance threshold.

1038 <sup>d</sup> A “previous association” means an association reported by the original GWAS;  
1039 “near” means within 1Mb (but these are all more than 500kb away from a previous  
1040 association since our classification of new multivariate SNPs requires this).

1041       Supplementary Tables 2a-m: **Lists of New *bmass* Multivariate Associa-**  
1042 **tions, per Dataset.** Attached Excel sheets list new *bmass* associations for each  
1043 dataset analyzed.

1044       Supplementary Tables 3a-m: **Lists of Retrieved Univariate Associations**  
1045 **From Original Publications, per Dataset.** Attached Excel sheets list the  
1046 rsID#'s of the univariate significant SNPs that were retrieved from the original  
1047 publication(s) associated with each dataset (see Online Methods for details).

1048       Supplementary Tables 4a-m: **Results for Previous Univariate Associa-**  
1049 **tions, per Dataset.** Attached Excel sheets give *bmass* results for previous uni-  
1050 variate associations, per dataset. Note that these results may not include all SNPs  
1051 from Tables 3a-m, because some SNPs were dropped during QC and other SNPs  
1052 were dropped because they did not reach univariate significance in the publicly  
1053 available summary data (see Online Methods for details).

1054        **Supplementary Table 5: Replication of New Multivariate Associations.**  
1055        Shown are example metrics of how well our new multivariate associations replicate  
1056        in datasets that allow such an evaluation. Specifically, for three of the studies  
1057        used (GlobalLipids, GIANT, and HaemgenRBC), there are multiple dataset re-  
1058        leases. To examine how well our new multivariate **bmss** associations replicate,  
1059        we compared the results from the first releases (“1<sup>st</sup>”) with the univariate GWAS  
1060        associations of the second releases (“2<sup>nd</sup>”). In essence, each of these approaches aim  
1061        to increase power – one by using a multivariate approach (**bmss**) and the other by  
1062        increasing sample size (the 2<sup>nd</sup> releases) – thus allowing us to compare the results  
1063        against one another. Univariate *p*-Value Threshold: univariate GWAS significance  
1064        *p*-value thresholds used by the original publication(s) for both the earlier (1<sup>st</sup>) and  
1065        later (2<sup>nd</sup>) releases. New Multivariate SNPs in 1<sup>st</sup>: number of new multivariate  
1066        associations from the earlier release. Lower Univariate *p*-Value in 2<sup>nd</sup>: number of  
1067        new multivariate associations from the earlier release that also have lower univari-  
1068        ate *p*-values in the later release. Below 2<sup>nd</sup> Univariate Threshold: number of new  
1069        multivariate associations from the earlier release that also cross the later release’s  
1070        univariate GWAS significance threshold.

1071        **Supplementary Table 6: *p*-Values for rs7515577 & rs12038699 in 2010**  
1072        **and 2013 GlobalLipids Releases** – In the 2010 release rs7515577 has a univari-  
1073        ate *p*-value that crosses the  $5 \times 10^{-8}$  threshold (TC), whereas rs12038699 does not.

1074 Since rs12038699 is near to rs7515577 it may get masked for future analyses; how-  
1075 ever in the 2013 data rs12038699 not only has a lower minimum univariate  $p$ -value,  
1076 but also has a different multivariate  $p$ -value pattern as compared to rs7515577.  
1077 Both these signals suggest that rs12038699 should be viewed as a separate GWAS  
1078 hit for GlobalLipids2013.

1079 **Supplementary Table 7: Top Multivariate Model Examples per SNP.**

1080 List of multivariate models that most frequently have the highest posterior prob-  
1081 abilities per SNP. Top 5 models are shown from across both the previous uni-  
1082 variate associations analyzed and the new multivariate associations discovered in  
1083 the GlobalLipids2013, GIANT2014/5, and HaemgenRBC2016 datasets. Pheno-  
1084 type ordering is shown in the header, where 0, 1, and 2 refer to the multivariate  
1085 categories of **Unassociated**, **Directly Associated**, and **Indirectly Associated**.  $n$  is  
1086 the number of SNPs that show the specified model as having the largest posterior  
1087 probability, with Mean Posterior displaying the average posterior probability of  
1088 the given model across the  $n$  SNPs, and Original Prior showing the prior estab-  
1089 lished for the given model from training on all the previous univariate associations  
1090 from that dataset.

## 1091 11 Tables

1092 Table 1: **Dataset Summary.**  $N$  is the maximum number of samples contributing  
1093 to each study.

1094 a - Low-Density Lipoproteins (LDL), High-Density Lipoproteins (HDL), Total  
1095 Cholesterol (TC), Total Triglycerides (TG)

1096 b - Body Mass Index (BMI), Waist-Hip Ratio adjusted for BMI (WHRadjBMI)

1097 c - Red Blood Cell Count (RBC), Packed Cell Volume (PCV), Mean Cell Volume  
1098 (MCV), Mean Cell Haemoglobin (MCH), Mean Cell Haemoglobin Concentration  
1099 (MCHC), Haemoglobin (Hb)

1100 d - Systolic Blood Pressure (SBP), Diastolic Blood Pressure (DBP), Pulse Pres-  
1101 sure (PP), Mean Arterial Pressure (MAP)

1102 e - Fasting Insulin (FstIns), Fasting Glucose (FstGlu), Homeostatic Model As-  
1103 sessment of Beta Cell Function (HOMA\_B), Homeostatic Model Assessment of  
1104 Insulin Resistance Function (HOMA\_IR)

1105 f - Forearm Bone Mineral Density (FA), Femoral Neck Bone Mineral Density (FN),  
1106 Lumbar Spine Bone Mineral Density (LS)

1107 g - Serum Iron (Iron), Serum Transferrin Saturation (Sat), Serum Transferrin  
1108 (TrnsFrn), Log-Transformed Ferritin (Log10Frtn)

1109 h - Number of Children Ever Born, Male & Female (NEB\_Pooled), Age at First  
1110 Birth, Male & Female (AFB\_Pooled)

1111 i - Serum Creatine (Crea), Serum Cystatin (Cys), Chronic Kidney Disease (CKD),  
1112 Urinary Albumin-to-Creatine Ratio (UACR), Microalbuminuria (MA)  
1113 j - Intracranial Volume (ICV), specified subcortical brain structures refer to MRI-  
1114 derived volume measurements for each one

1115 **Table 2: Summary of New Multivariate Associations Identified.** Pre-  
1116 vious Univariate: the number of previous genome-wide significant univariate as-  
1117 sociations based on the publicly available summary data. New Multivariate: the  
1118 number of new genome-wide significant multivariate associations.  $BF_{av}$  Thresh:  
1119 the Bayes Factor threshold used in declaring new multivariate associations to be  
1120 significant. Overlap With Next Release: for GlobalLipids2010, GIANT2010, and  
1121 HaemgenRBC2012, the last column shows the number of new multivariate asso-  
1122 ciations that overlap with the univariate GWAS associations in the next release  
1123 from the same consortium; overlap is defined as being within 50kb of the univariate  
1124 GWAS variant.
